# A burst of transposon expression accompanies the activation of Y chromosome fertility genes during *Drosophila* spermatogenesis

Matthew A. Lawlor, Weihuan Cao, Christopher E. Ellison

Department of Genetics, Human Genetics Institute of New Jersey, Rutgers University, Piscataway, New Jersey

Corresponding Author:

Christopher E. Ellison  
chris.ellison@rutgers.edu

## Abstract

Transposable elements (TEs) must replicate in germline cells to pass novel insertions to offspring. In *Drosophila melanogaster* ovaries, TEs can exploit specific developmental windows of opportunity to evade host silencing and increase their copy numbers. However, TE activity and host silencing in the distinct cell types of the *Drosophila melanogaster* testis are not well understood. We reanalyzed publicly available single-cell RNA-seq datasets to quantify TE expression in the distinct cell types of the *Drosophila* testis. We developed a novel method for identification of TE and host gene expression programs and find that a distinct population of early spermatocytes expresses a large number of TEs at much higher levels than other germline and somatic components of the testes. This burst of TE expression coincides with the activation of Y chromosome fertility factors and spermatocyte-specific transcriptional regulators, as well as downregulation of many components of the piRNA pathway. The TEs expressed by this cell population are enriched on the Y chromosome and depleted on the X chromosome relative to other active TEs. These data suggest that some TEs may achieve high insertional activity in males by exploiting a window of opportunity for mobilization created by the activation of spermatocyte-specific and Y-chromosome-specific transcriptional programs.

## Introduction

Transposable elements (TEs) are abundant in the genomes of plants and animals despite the presence of sophisticated host genome defense pathways. The genetic mechanisms responsible for the evolutionary success and persistence of TEs remain unclear. It is possible that the fitness benefit of complete TE suppression is not large enough to be evolutionarily favorable (Charlesworth and Langley 1986; Lee and Langley 2010; Kelleher and Barbash 2013). On the other hand, it is also possible that, like many viruses, TEs are engaged in an evolutionary arms race with their hosts, with TEs continuously evolving to escape silencing and the host genome continuously evolving to reestablish TE suppression (Parhad and Theurkauf 2019). Many host genes involved in TE defense are rapidly evolving, consistent with ongoing host-TE conflict (Kolaczowski, Hupalo, and Kern 2011; Obbard et al. 2011, 2006; Simkin et al. 2013; Helleu and Levine 2018; Crysnanto and Obbard 2019), however relatively few strategies where TEs can escape or evade host silencing have been identified (Cosby, Chang, and Feschotte 2019). In the *Drosophila* ovary, there is evidence that some TEs propagate in permissive nurse cells and hijack the host's mRNA transport pathway to move to the developing oocyte, which is more recalcitrant to TE expression (Wang et al. 2018). In another study, Dufourt et al. identified a small region of mitotically dividing germline cysts where the piRNA pathway gene *Piwi* is depleted and TE silencing is much weaker than in the surrounding cells. They termed this region the "piwiless

41 pocket” and proposed that TEs may take advantage of this niche to replicate in the *Drosophila* germline  
42 (Dufourt et al. 2014).

43 TE replication and host silencing have been extensively studied in the *Drosophila* ovary, however surprisingly  
44 little is known about these same phenomena in the testes. Several previous observations suggest that there  
45 may be substantial differences between ovaries and testes with respect to both TE activity levels and host  
46 silencing pathways. For example, multiple TE families are known to exhibit strong sex biases: The *I-element*,  
47 *P-element*, and *gypsy* TE families are all expressed at higher levels in the female germline (Busseau et al.  
48 1994; Péliesson et al. 1994; Roche, Schiff, and Rio 1995) whereas the opposite is true for the  *copia*, *micropia*,  
49 *1731*, and *412* TE families (Lankenau, Corces, and Lankenau 1994; Haoudi et al. 1997; Pasyukova et al. 1997;  
50 Borie et al. 2002). The piRNA pathway is active in both somatic and germline cells in the ovary and piRNAs  
51 bound by *Aub* and *Ago3* undergo robust ping-pong amplification in the ovarian germline. In the testes, TE-  
52 derived piRNAs are produced in germ cells, however the vast majority (~75%) arise from the  *suppressor of*  
53 *stellate* [*Su(Ste)*] and *AT-chX* satellite repeats, rather than the canonical piRNA clusters that have been  
54 identified in ovaries (Quénerch’du, Anand, and Toshie 2016; P. Chen et al. 2020). Furthermore, many TE  
55 families show large differences in piRNA abundance between ovaries and testes (P. Chen et al. 2020) and TE-  
56 derived piRNAs only show a weak signature of ping-pong amplification in spermatocytes, likely due to low  
57 levels or absence of *Ago3* (Quénerch’du, Anand, and Toshie 2016).

58 Here we have analyzed TE expression at single-cell resolution in order to gain insight into the dynamics of TE  
59 activity in *Drosophila* testes. We develop a novel approach for identification of TE and host gene expression  
60 programs and find that a subset of primary spermatocytes expresses a diverse group of TEs at high levels  
61 relative to other cell types. These TEs are co-expressed with Y-linked fertility factors and we find evidence that  
62 they are more active in males compared to females. These data suggest some TEs may exploit spermatocyte-  
63 specific transcriptional programs and Y chromosome activation to remain active in the *Drosophila*  
64 *melanogaster* genome.

## 66 Results

### 68 Data processing and cell type identification

69 We reanalyzed 10x Genomics 3’ single-cell expression data from a recent study examining sex chromosome  
70 gene expression in *D. melanogaster* larval testes (Mahadevaraju et al. 2020). The *Drosophila* larval testes are  
71 elongated spheres encased in epithelial cells. Their apical caps contain germline stem cells and the somatic  
72 cells of the GSC niche, the hub cells. The apical caps of the testes house mitotically dividing spermatogonial  
73 cysts, while the middle portion houses meiotic spermatocyte cysts encased by pairs of somatic cyst cells. L3  
74 larval testes include germ cell stages from GSC through primary spermatocytes, which exist in an extended  
75 meiotic prophase.

76 To quantify transposable element expression at single-cell resolution, we masked TE sequences in the *Iso1 D.*  
77 *melanogaster* release 6 genome assembly and appended the consensus sequences for all *D. melanogaster*  
78 RepBase TEs (Bao, Kojima, and Kohany 2015). We used this custom reference sequence to generate an  
79 aligner index for the 10x Genomics Cell Ranger 3.1.0 single-cell expression alignment and quantification  
80 pipeline (Zheng et al. 2017). We used scrublet (Wolock, Lopez, and Klein 2019) to remove putative doublet  
81 barcodes and applied scanpy (Wolf, Angerer, and Theis 2018) for basic preprocessing, normalization, scaling,  
82 and merging of the replicate datasets. To identify transcriptionally similar cell clusters, we excluded all  
83 transposons and generated a nearest neighbors graph. We applied the Leiden algorithm (Traag, Waltman, and  
84 van Eck 2019) to reveal 10 clusters, including several highly distinct clusters and several clusters with high

85 degrees of similarity, as indicated by adjacency in the UMAP embedding (Figure 1A). We classified each of  
86 these clusters using garnett (Pliner, Shendure, and Trapnell 2019) and a collection of curated markers (see  
87 Methods, Supplementary Table 1) to assign each cell to a known testis cell type (Figure 1B).

88 Our filtering approach is more conservative than applied to these data in their initial study, yielding a final  
89 dataset with fewer cells than originally published (Supplementary Figure 1D). To assess the similarity of our  
90 clusters with previously published clusters, we generated mean expression values per cluster for each gene  
91 and computed Spearman's rank correlation for each pairwise combination of clusters from each study  
92 (Supplementary Figure 1C). There is a strong correspondence between our clusters and those previously  
93 identified from these data, with high pairwise correlations for every cluster previously reported, though minor  
94 differences are apparent. Notably, we identify fewer distinct cyst cell clusters but more distinct spermatocyte  
95 clusters than reported in the original study.

96 Similar to the previously described analysis of these data (Mahadevaraju et al. 2020), we identify distinct  
97 somatic and germline clusters (Figure 1A). We identify cyst cells (clusters 7 and 8) which express *tj* and *wnt4*  
98 at high levels. Hub and terminal epithelial cells (cluster 10) are defined largely by *Fas3* expression, and  
99 pigment cells (cluster 9) express *Sox100B* (Figure 1B).

100 The remaining cells comprise the germline components of these data. Cluster 1 contains germline stem cells  
101 and early spermatogonia, marked by *vasa* and *spn-E* (Figure 1B). A second spermatogonial cluster  
102 (2/Spermatogonia) expresses spermatogonial markers such as *bam* and spermatocyte markers such as *aly*,  
103 which respectively are required for GSC differentiation and initiation of a primary spermatocyte transcription  
104 program. They are most transcriptionally similar to the G spermatogonia cluster identified by Mahadevaraju *et*  
105 *al.* but mean normalized UMI counts for this cluster also correlate well with that study's E1 early spermatocyte  
106 cluster (Supplementary Figure 1C). This observation suggests that our cluster 2 may represent spermatogonia  
107 just beginning the transition to meiotic prophase or the very early spermatocytes.

108 The final four clusters (3, 4, 5, and 6) represent the majority of filtered cells (Figure 1C) and express *aly* as well  
109 as *sa* and *can*, which are effectors of the primary spermatocyte expression program (Beall et al. 2007; White-  
110 Cooper et al. 1998) (Figure 1B). These clusters are transcriptionally similar to primary spermatocytes identified  
111 previously (Supplementary Figure 1C). Mean expression in clusters 3 and 4 correlates well with the previously  
112 reported early primary spermatocytes while expression in 5 and 6 correlates most highly with previously  
113 reported middle and late primary spermatocyte clusters (Supplementary Figure 1C). Taken together, these  
114 observations suggest that the germline clusters may be ordered from earliest to latest differentiation state by  
115 the cluster numbers reported here. However, among the later putative spermatocyte clusters (4, 5, and 6) it is  
116 challenging to definitively identify the differentiation order.

## 117 118 **A spermatocyte subpopulation shows high expression of transposable elements**

119 To quantify cell-type-specific TE expression in the *Drosophila* testis, we began by visualizing expression of all  
120 TEs with at least 3 UMIs detected across all individual cells (Figure 2). While individual somatic cyst cells and  
121 pigment cells sporadically express a small number of TEs, there is no evidence for cell-type specific  
122 upregulation of distinct TE families in these cells. On the other hand, a small number of TE families show high  
123 expression specifically in the terminal epithelial or spermatogonia clusters. Most striking, however, are the cells  
124 from cluster 3 spermatocytes, whose members uniformly express a relatively large number of TE families at  
125 high levels (Figure 2). In fact, cluster 3 spermatocytes have the most TE-derived UMIs per cell, for both depth-  
126 normalized and raw UMI counts (Supplementary Figure 2A, 2B). UMAP embedding and Leiden clustering was  
127 performed on highly variable host genes only, suggesting that cluster 3 is transcriptionally distinct from other  
128 spermatocytes independent of TE expression.

To verify that the detected TE expression pattern is not a technical artifact of 10X scRNA-seq, we aligned L3 larval testis poly-A selected RNA-seq reads generated alongside the single cell data (Mahadevaraju et al. 2020). Summarized pseudo-bulk expression estimates derived from the scRNA-seq data are highly concordant with bulk expression both globally and with respect to TEs specifically (Supplementary Figure 1A, 1B). We next assessed whether TE fragments nested in other cellular RNAs may be artificially increasing measurements of TE expression in the testes. While several families (2 out of 125 families analyzed) exhibit extreme coverage at localized portions of their consensus sequence, consistent with truncated copies and/or host gene-TE fusions, the vast majority of TE families expressed in testis show coverage throughout their consensus sequences and within-TE RNA-seq signal variability is comparable to single isoform host genes (Supplementary Figure 2C, 2D). We additionally queried poly-A RNA-seq reads from w1118 testis to test if detected TE expression is a consequence of chimeric transcripts produced by TE insertions within host genes. Only a small number of TEs show evidence of reproducible chimeric transcripts (Supplementary Figure 2E, 2F).

### **Independent Component Analysis reveals a TE-enriched gene expression program**

To identify host gene expression programs (GEPs) co-expressed with TEs, we implemented a GEP detection pipeline using Independent Component Analysis (ICA). ICA has previously been shown to perform favorably compared to other GEP detection methods (Saelens, Cannoodt, and Saeyns 2018). Along with other matrix-factorization approaches, ICA yields a biologically interpretable pair of matrices.

Some factorization approaches, such as ICA and non-negative matrix factorization (NMF) suffer from stochastically varying solutions. Kotliar et al. have previously introduced an elegant approach, termed consensus NMF (cNMF), to stabilize NMF solutions for scRNA-seq GEP detection (Kotliar et al. 2019). This approach clusters the results of many iterations of NMF to buffer the influence of outlier solutions yielded by single runs of the algorithm. However, when we implemented this approach, we found that it yielded large GEPs utilized by broad cell types. We therefore chose to use ICA factorization because this approach was able to group genes into smaller GEPs expressed specifically by smaller cell populations.

We applied this consensus approach to ICA to address the issue of ICA solution randomness. We additionally applied a grid search approach to choose the two most important parameters of our pipeline – the number of components ( $k$ ) to decompose the single cell expression matrix into and the appropriate cutoff ( $q$ ) for identifying the distinct members of each GEP (see Methods).

We ran our consensus ICA approach three times for combinations of selected  $k$ -values from 10 to 150 and  $q$ -value cutoffs from 0.001 to 0.16. We assessed the biological interpretability of the candidate solutions by enrichment for Gene Ontology Biological Process (GO:BP) terms. We found that optimizing only for maximum percentage of GO:BP-enriched GEPs yielded mostly large GEPs associated with very general biological processes. Under the assumption that a maximally interpretable set of GEPs should capture a wide range of biological processes and should favor discovery of minimally redundant GEPs, we then calculated two scores: one based on the breadth of GO:BP enrichments in a given ICA solution and the other on the unique assignments of GO terms to GEPs (see Methods). These scores are highly reproducible across replicate runs of cICA (Supplementary Figure 2A).

We combined these two metrics into a joint score for each combination of  $k$ - and  $q$ -parameters. We selected an optimal combination of  $k$  (90) and  $q$  (0.005) and used the GEPs identified from independent runs as our working GEPs for this study. The GEPs identified using this approach range in size from 10 genes to over 600, with 75% of identified GEPs containing 200 or fewer genes (Supplementary Figure 2B). Sixty-nine percent of identified GEPs were enriched at  $p < 0.05$  for a Biological Process GO term not enriched in any other GEP (Supplementary Figure 3C).

173 Our method identified many GEPs with at least one TE included alongside host genes, but a single GEP (GEP-  
174 27) included over 70 transposons along with approximately 300 host genes (Figure 3A, 3B). All major classes  
175 of TEs are represented in this GEP, including LTR and non-LTR retroelements and DNA transposons.  
176 Interestingly, we find that these TEs are enriched for elements located within the flamenco piRNA cluster,  
177 which is involved in TE suppression in ovarian follicle cells (Brennecke et al. 2007) (Fisher's Exact Test  
178  $P=0.03$ ). Several other TEs in this GEP have previously been shown to be male-biased: the LTR  
179 retrotransposons *1731*, *412*, and *copia* are expressed at high levels in the primary spermatocytes of *D.*  
180 *melanogaster* (Haoudi et al. 1997; Borie et al. 2002; Pasyukova et al. 1997), while *micropia* transcripts have  
181 been shown to be associated with Y chromosome lampbrush loops in the primary spermatocytes of *D. hydei*  
182 (Lankenau, Corces, and Lankenau 1994). We visualized per-cell expression scores (see Methods) for GEP-27  
183 on the UMAP projection and observed that it is expressed exclusively by cells in cluster 3, in agreement with  
184 our visual inspection of TE expression across the dataset (Figure 3C). These results suggest that a burst of TE  
185 expression occurs in a distinct subcluster of primary spermatocytes in the larval testes.

186 We identified *EAC<sub>hm</sub>*, a host gene TEP member highly expressed in the TEP-expressing population (Figure  
187 4A) as a marker for TEP-expressing spermatocytes. *EAC<sub>hm</sub>* is an enhancer of *chm* acetyltransferase activity  
188 that shows high expression in testis in modEncode RNA-seq data (J. B. Brown et al. 2014; Larkin et al. 2021).  
189 Its role in spermatogenesis is currently unknown. We next performed multiplexed RNA-FISH in whole mount  
190 L3 testes for *EAC<sub>hm</sub>* and two TEP-TEs, *ACCORD2* and *QUASIMODO2* (Figure 4A) to confirm co-expression  
191 of TEP-TEs with host genes in 3/Spermatocyte cells. We find that *EAC<sub>hm</sub>*, *ACCORD2*, and *QUASIMODO2*  
192 show similar spatial patterns of expression, consistent with their membership in the same gene expression  
193 program (Figure 4C, Supplementary Figures 5, 6, 7). Furthermore, the transcripts of all three elements are  
194 confined to the central portion of the larval testis, in agreement with our assessment that TEP-expressing cells  
195 are primary spermatocytes.

196 We next sought to determine whether the same gene module is expressed in the testes of adult flies. To do so,  
197 we reanalyzed previously published single-cell RNA-seq from adult testes of a different *D. melanogaster* strain  
198 (Witt et al. 2019). The TE expression profile from our 3/spermatocyte cells that express GEP-27 is highly  
199 correlated with a putative spermatocyte cluster we identified in the Witt et al. data, suggesting that the TEP we  
200 identified in larval testes is also expressed in the testes of adults as well as other strains of *D. melanogaster*  
201 (Spearman's  $R=0.49$ ,  $P=9.3e-6$ )(Supplementary Figure 3D).

202 In order to better understand why TEs are upregulated specifically in the cluster 3 cells, we examined GEP-27  
203 and found that the program contains primary spermatocyte-restricted genes that are required for sperm  
204 maturation (Supplementary Figure 8A). Two testis-specific TBP associated factors (TAFs), *can* and *sa*, are  
205 members of the TEP, although they are not exclusively expressed in cluster 3. Testis-specific Meiotic Arrest  
206 Complex (tMAC) components *aly* and *wuc*, which promote transcription of spermatocyte-specific genes by  
207 activating alternative promoters (Lu et al. 2020), are members of the TEP, as well as *kmg*, which blocks  
208 promiscuous activation of genes by tMAC (Kim et al. 2017). This supports our analysis suggesting cluster 3 is  
209 predominantly composed of primary spermatocytes.

210 GO enrichment analysis shows that GEP-27 is enriched for genes that function in axonemal assembly and  
211 cilium movement, including the Y chromosome fertility factors *kl-2*, *kl-3*, and *kl-5*, which are expressed  
212 specifically in primary spermatocytes (Goldstein, Hardy, and Lindsley 1982)(Figure 4C, Supplementary Figure  
213 8B). GEP-27 is significantly enriched for genes from the Y chromosome: 6 of 9 Y chromosome genes detected  
214 in these data are assigned to GEP-27 (Supplementary Figure 8C, Chi-square test  $P=1.7e-05$ ).

215 In meiotic prophase, 16-cell primary spermatocytes undergo chromatin decondensation and greatly increase in  
216 size (McKee, Yan, and Tsai 2012). Y-chromosome lampbrush loops also form at this stage of development  
217 and the Y chromosome becomes enriched for the H3K9ac histone modification, which is associated with active

transcription (Hennig and Weyrich 2013). Consistent with this phenomenon, we also find that *tplus3a* and *tplus3b*, two genes required for expression of Y chromosome fertility factors (Hundertmark et al. 2019), are members of GEP-27 as well as *bol*, which binds the decondensed giant introns of several Y loop-forming genes (Redhouse, Mozziconacci, and White 2011). Expression of the 6 Y-linked genes, *bol*, *tplus3a*, and *tplus3b*, is highest in cluster 3 spermatocytes (Supplementary Figure 8A). These results are consistent with the burst of TE activity that we observe in cluster 3/Spermatocyte cells coinciding with the activation of the Y chromosome fertility genes.

## TEP-TEs are enriched on the Y chromosome

Given that the TEP-TEs are co-expressed with Y chromosome fertility genes, we hypothesized that their upregulation is due to activation of Y-linked copies of these TEs. To address this hypothesis, we first investigated whether TEP-TEs do indeed have copies that are located on the Y chromosome.

We first used RepeatMasker to identify transposon insertions in a recently published *Drosophila melanogaster* *Iso1* strain genome assembly with improved Y chromosome content (Chang and Larracuenté 2019) compared with the current *D. melanogaster* Release 6 reference sequence. We found that 70% of TEP-TEs have at least one full-length copy located on a known Y-linked scaffold (Supplementary Figure 8D) and a significantly larger percentage of TEP-TE insertions are found on the Y chromosome compared with other expressed TEs (Chi-square test  $P=2.29e-292$ , Figure 5A). We also estimated male-specific TE copy numbers by performing Illumina whole-genome sequencing (WGS) of males and females from strain *w1118*. We found that TEP-TEs have significantly elevated copy numbers in males, compared to females, as expected if these TEs have insertions located on the Y chromosome (Wilcoxon Rank-Sum test  $P=0.0035$ , Figure 5B).

Given that TEP-TEs are enriched on the Y chromosome, we next assessed whether their Y-linked copies are over-expressed in testes relative to their autosomal and X-linked copies. We used male and female WGS reads from *w1118* to identify male-specific (i.e. Y-linked) single-nucleotide variants in TEP-TEs. We then compared the relative abundance of each male-specific variant in testes RNA-seq data to its relative abundance in male WGS data (see Methods). A ratio larger than 1 indicates the presence of one or more Y-linked TE insertions that are expressed more highly than total-copy number alone would explain. For each expressed TE, we found the site of the male-specific allele most overexpressed relative to WGS depth. At these sites, male-specific TEP-TE alleles have significantly higher ratios of relative RNA to DNA coverage compared to male-specific alleles from non-TEP-TEs (Wilcoxon Rank-Sum test  $P=1.7e-07$ , Figure 5C). To confirm that this effect is specific to Y-linked TEP-TEs, we repeated our analysis using reference sites as well as autosomal (i.e. present in both males and females) variants. Contrary to the Y-linked TEP-TEs, these were expressed proportionately to WGS depth with no difference in expression proportion between TEP-TEs and other TEs (Wilcoxon Rank-Sum test  $P=0.24$ , Supplementary Figure 8F).

We next investigated whether the TEP-TEs show increased insertional activity in males. Polymorphic TE insertions reflect recent TE insertions that are still segregating within a population. If the TEP-TEs replicate more often in males compared to females, recent polymorphic insertions of these TEs should be depleted from the X chromosome because this chromosome is hemizygous in males and is therefore a smaller mutational target. We used the TIDAL-FLY database of polymorphic TE insertions (Rahman et al. 2015) for the *Drosophila* Genetic Reference Panel (DGRP) to compare insertion frequencies of TEP-TEs versus other active TEs. We found that non-TEP-TEs exhibit similar X and autosomal insertion rates across the DGRP lines whereas TEP-TEs exhibit a significantly reduced frequency of X-linked insertions relative to autosomal insertions, consistent with male-biased activity (Wilcoxon Rank-Sum test  $P=0.029$ , Figure 5D).

*Ago3*, a piRNA pathway gene involved in the ping-pong piRNA amplification cycle, is present in germline stem cells and spermatogonia but undetectable in spermatocytes (Quénerch' du, Anand, and Toshie 2016). To

263 determine whether there is a general trend of downregulation of piRNA pathway genes in spermatocytes  
264 compared to spermatogonia, we quantified expression of 31 piRNA pathway genes described in (Czech et al.  
265 2018). We found a clear trend showing a striking downregulation of most piRNA pathway genes during the  
266 developmental transition from spermatogonia to spermatocytes (Figure 5E). Together, our results suggest that  
267 a burst of TE expression in *Drosophila* testes coincides with the activation of Y chromosome fertility genes and  
268 the downregulation of piRNA pathway genes.

269

## 270 Discussion

271

272 In *Drosophila* ovaries, constrained developmental processes such as the nurse cell to oocyte mRNA transport  
273 pathway create a window of opportunity that TEs have evolved to exploit in order to increase their own copy  
274 numbers (Wang et al. 2018). Our results suggest a similar phenomenon has occurred in the testes, albeit via a  
275 different window of opportunity. A major source of TE activity in the testes is related to the presence of the Y  
276 chromosome itself. This chromosome acts as a safe harbor for TE insertions: The lack of recombination on the  
277 Y chromosome prevents efficient purging of Y-linked TEs from the population, allowing their accumulation  
278 along with other repetitive elements such as satellite DNA (Bachtrog 2013). However, the Y chromosome  
279 usually exists as tightly packaged, transcriptionally silent, heterochromatin. How can the presence of this inert  
280 chromosome lead to TE activation? Interestingly, there is evidence that the Y chromosome can act as a “sink”  
281 for heterochromatin: its presence may cause a genome-wide reallocation of repressive histone modifications,  
282 which can lead to TE de-repression (Henikoff 1996; Francisco and Lemos 2014; E. J. Brown and Bachtrog  
283 2014; E. J. Brown, Nguyen, and Bachtrog 2020). On the other hand, Wei et al. have recently described a  
284 phenomenon that they term “Y toxicity” based on the upregulation of TEs present on the neo-Y chromosome of  
285 *Drosophila miranda* during embryogenesis (Wei, Gibilisco, and Bachtrog 2020). Their results suggest that  
286 transcription of the relatively large number of genes on the young neo-Y chromosome prevents complete  
287 silencing of this chromosome and therefore provides an opportunity for transcriptional activation of neo-Y-  
288 linked TEs.

289 Our results suggest that the Y toxicity phenomenon applies to older Y chromosomes as well. The ancient  
290 *Drosophila melanogaster* Y chromosome carries many fewer genes compared to the *D. miranda* neo-Y  
291 chromosome, however, at least six genes on the *D. melanogaster* Y chromosome are essential for male fertility  
292 (Brosseau 1960; Kennison 1981; Gatti and Pimpinelli 1983; Hazelrigg, Fornili, and Kaufman 1982). These  
293 genes are known as fertility factors and they are only expressed during spermatogenesis (Hardy, Tokuyasu,  
294 and Lindsley 1981). The three annotated fertility factors, *kl-2*, *kl-3*, and *kl-5*, each span as much as 4 Mb due to  
295 their extraordinarily large introns and become transcriptionally activated in primary spermatocytes, which  
296 coincides with a general decondensation and acetylation of the Y chromosome (Fingerhut, Moran, and  
297 Yamashita 2019). The transcription of three of these genes, *kl-5*, *kl-3*, and *ks-1*, is associated with the  
298 formation of large Y chromosome lampbrush loops (Bonaccorsi et al. 1988). The burst of TE expression that  
299 we describe here co-occurs with the activation of *kl-2*, *kl-3* and *kl-5*, as well as six other Y-linked genes: *ORY*,  
300 *ARY*, *Ppr-Y*, *Pp1-Y1*, *CG45765*, and *CCY*. Based on these results, we propose that the TEP-TEs have evolved  
301 to exploit a window of opportunity that occurs during the decondensation of the normally tightly packaged Y-  
302 linked chromatin, which is necessary for transcription of fertility factor genes. Notably, not all TE families with  
303 intact Y-linked insertions are members of the TEP, suggesting that additional features beyond Y-linkage, such  
304 as specific regulatory elements, are required for TEs to exploit this opportunity. Four TEP-TEs, *1731*, *412*,  
305 *copia*, and *micropia* have previously been shown to be highly expressed in primary spermatocytes in  
306 *Drosophila* and *micropia* transcripts are physically associated with Y chromosome lampbrush loops in *D. hydei*  
307 (Haoudi et al. 1997; Borie et al. 2002; Pasyukova et al. 1997; Lanckenau, Corces, and Lanckenau 1994).

308 Interestingly, another 20 TEP-TEs, including *gypsy*, have insertions located within the *flamenco* piRNA cluster.  
309 Chalvet et al identified multiple strains of *D. melanogaster* where active *gypsy* elements are confined to the Y  
310 chromosome (Chalvet et al. 1998). They proposed that Y-linked *gypsy* insertions are able to evade silencing by  
311 the ovary-dominant *flamenco* locus, which may explain the enrichment of *flamenco*-regulated TEs among  
312 members of the TEP. Indeed, more recent research has found that *flamenco*-derived piRNAs are almost an  
313 order of magnitude more abundant in ovaries compared to testes (P. Chen et al. 2020).

314 *Flamenco* is not unique in this respect – the majority of known piRNA clusters produce more abundant piRNA  
315 in ovaries compared to testes (P. Chen et al. 2020). Spermatocytes also lack a robust ping-pong amplification  
316 loop and the bulk of spermatocyte piRNAs come not from TEs, but rather two satellite repeats: *su(Ste)* and *AT-*  
317 *chX* (Nagao et al. 2010). Furthermore, piRNA factors such as Piwi and Ago3, while abundant in germline stem  
318 cells and spermatogonia, are missing or present at low levels in spermatocytes (Nagao et al. 2010;  
319 Quénerch’du, Anand, and Toshie 2016). Our analysis of scRNA-seq data confirm these findings (Figure 5E).  
320 Why do spermatocytes show a weakened piRNA response at a developmental timepoint when the TE-rich Y  
321 chromosome is de-repressed? One possibility is related to intragenomic conflict. Sex chromosomes are  
322 hotspots for genomic conflict (Bachtrog 2020) and small RNA pathways may play an outsize role in defending  
323 against meiotic drivers in the male germline (Courret et al. 2019; Lin et al. 2018). There is evidence that  
324 *stellate* and *su(Ste)* represent a cryptic meiotic drive system where X-linked *stellate* genes disrupt  
325 spermatogenesis and cause sex-ratio distortion in the absence of the Y-linked *su(Ste)* piRNA cluster (Hurst  
326 1996; Bozzetti et al. 1995). The function of *AT-chX* is less clear. Although this locus was originally proposed to  
327 play a role in the developmental silencing of *vasa* during spermatogenesis (Nishida et al. 2007), recent results  
328 instead suggest of role for *AT-chX* in hybrid incompatibility (Kotov et al. 2019). Neither loci are present in the  
329 genomes of close relatives of *D. melanogaster*, suggesting that they are dispensable for spermatogenesis  
330 (Adashev et al. 2020; Kotov et al. 2019). The fact that both *su(Ste)* and *AT-chX* rapidly evolved to be essential  
331 for fertility in *D. melanogaster* is consistent with a role in mediating genetic conflict. This is especially clear for  
332 *su(Ste)* where the *stellate* protein is completely absent from wild-type flies (Adashev et al. 2020). If the *su(Ste)*  
333 and *AT-chX* piRNAs evolved to suppress segregation distorters or other forms of selfish elements, it would  
334 suggest that there has been a tradeoff in the piRNA system in *D. melanogaster* spermatocytes, where  
335 increased abundance of *su(Ste)* and *AT-chX* piRNAs comes at a cost of impaired TE silencing. Future work  
336 investigating the peculiarities of TE silencing in the testes will help shed light upon this and other constraints  
337 imposed by the various roles of piRNAs in the male germline, including host gene regulation, TE silencing, and  
338 the resolution of intragenomic conflicts.

339

## 340 Methods

341

342 All code is provided as a snakemake workflow (Mölder et al. 2021) at [github.com/Ellison-Lab/TestisTEs2021](https://github.com/Ellison-Lab/TestisTEs2021).  
343 Male and female *w1118* whole genome sequencing data and *w1118* total RNA-seq data are deposited at  
344 PRJNA727858.

### 345 Repeat masking and custom reference sequence generation

346 All repeat masking was performed with RepeatMasker (Smith, Hubley, and Green 2013) with the following  
347 options: “-e ncbi -s -no\_is -nolow.” We used RepBase *D. melanogaster* consensus TE sequences (version  
348 20170127) (Bao, Kojima, and Kohany 2015) as a custom library.

349 For the purposes of generating reference sequences for alignments, we appended the consensus TE  
350 sequences to the masked *D. melanogaster* r6.22 sequence.



## 351 **scRNA-seq processing**

352 Single cell RNA-seq data was downloaded from PRJNA548742 and PRJNA518743. We used 10X Genomics  
353 cellranger software to align and quantify the data (Zheng et al. 2017). We generated a cellranger index from  
354 the previously described custom reference sequence using cellranger's "mkref" command with default  
355 parameters. We aligned scRNA-seq reads using cellranger's "count" command with default parameters. We  
356 used cellranger's filtered count matrices for further analysis.

357 We first summed counts assigned to the LTR and internal sequences of class I LTR retrotransposons. For  
358 each scRNA-seq replicate, we next applied scrublet v0.2.1 (Wolock, Lopez, and Klein 2019) to these  
359 unnormalized count matrices to identify and filter putative heterotypic doublets. We used scanpy v1.6.0 (Wolf,  
360 Angerer, and Theis 2018) to retain genes detected in at least 3 cells and then cells with at least 250 and fewer  
361 than 5000 detected genes. We removed cells with more than 5% of remaining UMIs assigned to  
362 mitochondrion-encoded genes. We normalized UMI counts to 10000 per cell and applied log transformation  
363 with a pseudo-count of 1. We identified highly variable genes using scanpy's "highly\_variable\_genes" method  
364 with default parameters. We next scaled counts using scanpy's "scale" method and applied scanpy's  
365 "regress\_out" method to remove count variance associated with cell cycle and mitochondrial UMI counts.

366 For each replicate, we used scanpy to perform principal component analysis on highly variable host genes and  
367 calculate nearest neighbor graphs using 15 principal components and 25 neighbors. We called cell clusters  
368 using the Leiden algorithm (Traag, Waltman, and van Eck 2019) via scanpy with a resolution parameter of  
369 0.35. We combined all three larval scRNA-seq replicates using scanpy's "ingest" method.

370 Automated cell type assignment was performed using Garnett v0.2.17 (Pliner, Shendure, and Trapnell 2019)  
371 and a set of curated marker genes (Supplementary Table 1).

## 372 **Consensus ICA for GEP Detection**

373 We chose ICA to identify gene expression programs because it performs highly with respect to recovering  
374 known functional gene modules and because it is easily adaptable to finding partially overlapping modules  
375 (Saelens, Cannoodt, and Saeys 2018). We standardized the normalized, log-transformed expression matrix to  
376 have zero mean and unit variance. Standardized scores were clipped to a maximum absolute value of 10.

377 To generate stable modules that are robust to stochastically varying ICA solutions, we applied a consensus  
378 approach previously applied to non-negative matrix factorization gene module detection (Kotliar et al. 2019).  
379 We used FastICA via sklearn (Pedregosa et al. 2012) to decompose the standardized expression matrix into  
380 90 components 100 times, then concatenated the resulting gene x module matrices, partitioned all modules  
381 into 90 clusters using k-means clustering, and averaged the per-cell scores within each partition to yield a  
382 consensus cell x module matrix. Within the same partitions, we averaged per-gene scores from cell x module  
383 matrices to generate a consensus cell x module matrix.

384 We assigned genes to each program by applying fdrtool (Strimmer 2008) to the vector of gene weights for  
385 each module. Genes with FDR q-values less than 0.005 for each module were considered members of the  
386 module.

## 387 **GEP parameter optimization**

388 Use of ICA or other matrix decomposition approaches for gene program detection requires *a priori*  
389 assumptions about the optimal number of components ( $k$ ) to request from the decomposition algorithm.  
390 Additionally, generation of discrete gene lists for each gene program requires application of arbitrary score  
391 cutoffs to determine program membership for each gene.

392 To reduce bias and use of arbitrary cutoffs, we used a grid search approach to choose  $k$  and the q-value cutoff  
393 for membership. Briefly, we ran consensus ICA in triplicate for combinations of q-value cutoffs between 0.005  
394 and 0.1 and  $k$  between 20 and 120. We performed pathway enrichment analysis for each program discovered  
395 in each consensus ICA replicate and for each run calculated the percentage of GO:BP terms with significant  
396 enrichment as well as the percentage of programs in each run that show a unique significant enrichment. We  
397 then rescaled these scores to a maximum of 1 and calculated a joint score by multiplying them together. For  
398 our final set of gene programs, we ran consensus ICA a final time with the  $k$  and q-value that maximized the  
399 average joint score across all three test replicates.

#### 400 **Poly-A RNA-seq**

401 We trimmed poly-A selected RNA-seq (SRR7276830, SRR7276831, SRR7276832, SRR7276833) with fastp  
402 v0.20.0 (S. Chen et al. 2018) and aligned to the custom reference using STAR v2.7.3 (Dobin et al. 2013) with  
403 chimeric junction detection turned on and “--chimScoreJunctionNonGTAG 0”. Other non-default parameters  
404 used are available via the linked github repository.

405 We calculated normalized coverage for each strand using deeptools v3.3.1 (Ramírez et al. 2014)  
406 “bamCoverage” command with “--smoothLength 150.”

#### 407 **WGS library preparation**

408 20 0- to 3-day old *w1118* males or females were collected on dry ice and then homogenized using an electric  
409 pestle. Qia-Amp DNA Micro kit was used according to instructions. DNA was diluted to 40 ng/ul in 55 ul of  
410 Elution Buffer and sheared in a Covaris sonicator with settings as follows: 10% duty cycle, 2.0 intensity, 200  
411 cycles per burst, 1 cycle, 45 second process time.

412 WGS library generation protocol was adapted from the Marshall Lab DamID-seq protocol available at [marshall-](http://marshall-lab.org)  
413 [lab.org](http://marshall-lab.org) (Marshall et al. 2016). Briefly, sheared DNA was purified with homemade purification beads. End repair  
414 was performed with T4 DNA Ligase (NEB M0202S), T4 DNA Polymerase (NEB M0203S), PolI Klenow  
415 fragment (NEB M0210S), T4 Polynucleotide kinase (NEB M0201S). Adenylation was performed with 3’-5’  
416 Klenow Fragment (NEB M0212L). Adaptors were ligated with NEB Quick Ligase for 10 minutes at 30°C before  
417 two rounds of cleanup with homemade beads. NEBNext Ultrall Q5 kit (NEB M0544) was used for PCR  
418 enrichment. A final round of cleanup with homemade beads was performed before quantification and  
419 sequencing.

#### 420 **WGS processing**

421 We trimmed reads using cutadapt v3.2.0 (Martin 2011) with options “-q 20 -m 35.” We aligned trimmed reads  
422 with bwa-mem2 v2.0 (Vasimuddin et al. 2019), removed duplicate reads with picard v2.22.1 (“Picard” n.d.) with  
423 option “VALIDATION\_STRINGENCY=LENIENT”, and filtered out multimappers with samtools v1.10 (Danecek  
424 et al. 2021).

425 To estimate TE copy number estimation we used mosdepth v0.3.1 (Pedersen and Quinlan 2018) to calculate  
426 genome-wide read coverage in 100 bp bins, then compared TE coverage to autosome coverage.

427 We identified male-specific polymorphic sites with Rsamtools (Morgan M, Pagès H, Obenchain V, Hayden N  
428 2020) by finding mismatches with a base quality of at least 10 and at least 15 supporting male reads but  
429 lacking supporting female reads.

#### 430 **Total RNA-seq library preparation**

431 We used approximately 100 pairs of testes from 3-5-day old mated *w1118* males. The testes were dissected  
432 in 1X PBS and transferred into 200  $\mu$ L RNAlater Solution. Tissue was pelleted by centrifuging at 5000g for 1

433 min at 4 °C. Supernatant was removed and 300 µL 1x DNA/RNA Shield was added before homogenization  
434 with an electric pestle. Homogenized tissue was digested with Proteinase K at 55 °C for at least 30 min. RNA  
435 was purified with the Zymo Quick-RNA Plus Kit (R1057).

436 Using up to 5 µg total RNA, ribosomal RNAs were removed using iTools rRNA depletion Kit from Galen  
437 Laboratory Supplies (dp-P020-000007) and Thermo Fisher MyOne Streptavidin C1 Dynabeads (#65001). RNA  
438 Clean & Concentrator-5 kit from Zymo Research (R1015) was used to purify rRNA-depleted RNA. Starting with  
439 1 ng-100 ng purified rRNA-depleted RNA, Illumina libraries were generated using NEBNext Ultra II Directional  
440 RNA Library Prep Kit for Illumina (E7760).

#### 441 **Total RNA-seq processing**

442 Raw reads were trimmed with fastp v0.20.0. We used STAR v2.7.5 (Dobin et al. 2013) to align total RNAseq  
443 reads to a bait reference composed of Flybase release 6.22 tRNA sequences and miscRNA sequences. We  
444 then aligned unmapped reads to our custom reference and provided STAR with a VCF file containing male-  
445 specific variants.

#### 446 **DGRP Polymorphic TE insertions**

447 Using the TIDAL-Fly polymorphic TE insertion database (Rahman et al. 2015), we found the number of unique  
448 polymorphic insertions on the X chromosome and on autosomes, excluding chromosome 4, across the  
449 Drosophila Genome Reference Panel for all TEs in our custom reference. For all TEs with at least 1 X-linked  
450 and 1 autosomal insertion among all DGRP lines, we calculated the ratio of X-linked insertions per megabase  
451 to autosomal insertions per megabase.

#### 452 **RNA-FISH**

453 Custom Stellaris FISH probes recognizing *EAC<sub>hm</sub>* labeled with Quasar670 and against *Accord2* and  
454 *Quasimodo2* labeled with CAL Fluor Red 610 were designed using Stellaris' probe design tool available at  
455 [www.biosearchtech.com/stellarisdesigner](http://www.biosearchtech.com/stellarisdesigner). Default parameters were used for *EAC<sub>hm</sub>* probes. Probes against  
456 *Accord2* and *Quasimodo2* were designed with masking parameter 2. To ensure specificity of the resulting  
457 probes, we used BLAST (Camacho et al. 2009) to align to consensus TE sequences used for masking and  
458 custom reference generation to ensure that all probes show complementarity to their intended target only.  
459 *Accord2* and *Quasimodo2* probes were also blasted against *Drosophila melanogaster* REFSEQ sequences  
460 and any individual probes with more than 16 nucleotide matches to another sequence were removed from the  
461 final probe set.

462 Strain *w<sup>1118</sup>* flies maintained at room temperature were mated for 4 hours and offspring were grown at 25°C  
463 until reaching the third instar. We dissected L3 males in sterile 1X PBS and fixed testis in 3.7% formaldehyde  
464 solution at room temperature for 45 minutes. Testis were washed twice with 1X PBS and submerged in 70%  
465 ethanol at 4°C overnight. Hybridizations were carried out according to instructions available on the  
466 manufacturer website.

467 Image slices were captured on a Carl Zeiss LSM880 AxioObserver with a C-Apochromat 40x/1.2 W Korr FCS  
468 M27 water immersion objective. 2D deconvolution was performed using ZEN Black software. Further contrast  
469 adjustments and image overlays were performed with Fiji (Schindelin et al. 2012).

#### 470 **Acknowledgements**

471

472 The authors acknowledge the laboratory of Dr. Maureen Barr for use of their confocal microscope and Dr. Juan  
473 Wang for microscopy training and assistance. The authors also acknowledge the Office of Advanced Research  
474 Computing (OARC) at Rutgers, The State University of New Jersey for providing access to the Amarel cluster  
475 and associated research computing resources that have contributed to the results reported here.  
476

## 477 References

478

- 479 Adashev, Vladimir E., Alexei A. Kotov, Sergei S. Bazylev, Aleksei S. Shatskikh, Alexei A. Aravin, and Ludmila  
480 V. Olenina. 2020. "Stellate Genes and the PiRNA Pathway in Speciation and Reproductive Isolation of  
481 *Drosophila Melanogaster*." *Frontiers in Genetics* 11: 610665.
- 482 Bachtrog, Doris. 2013. "Y-Chromosome Evolution: Emerging Insights into Processes of Y-Chromosome  
483 Degeneration." *Nature Reviews. Genetics* 14 (2): 113–24.
- 484 ———. 2020. "The Y Chromosome as a Battleground for Intragenomic Conflict." *Trends in Genetics: TIG* 36  
485 (7): 510–22.
- 486 Bao, Weidong, Kenji K. Kojima, and Oleksiy Kohany. 2015. "Rebase Update, a Database of Repetitive  
487 Elements in Eukaryotic Genomes." *Mobile DNA* 6 (June): 11.
- 488 Beall, Eileen L., Peter W. Lewis, Maren Bell, Michael Rocha, D. Leanne Jones, and Michael R. Botchan. 2007.  
489 "Discovery of TMAC: A *Drosophila* Testis-Specific Meiotic Arrest Complex Paralogous to Myb-Muv B." *Genes and Development* 21 (8): 904–19.
- 490 Bonaccorsi, S., C. Pisano, F. Puoti, and M. Gatti. 1988. "Y Chromosome Loops in *Drosophila Melanogaster*."  
491 *Genetics* 120 (4): 1015–34.
- 492 Borie, N., C. Maisonhaute, S. Sarrazin, C. Loevenbruck, and C. Biémont. 2002. "Tissue-Specificity of 412  
493 Retrotransposon Expression in *Drosophila Simulans* and *D. Melanogaster*." *Heredity* 89 (4): 247–52.
- 494 Bozzetti, M. P., S. Massari, P. Finelli, F. Meggio, L. A. Pinna, B. Boldyreff, O. G. Issinger, G. Palumbo, C.  
495 Ciriaco, and S. Bonaccorsi. 1995. "The Ste Locus, a Component of the Parasitic Cry-Ste System of  
496 *Drosophila Melanogaster*, Encodes a Protein That Forms Crystals in Primary Spermatocytes and  
497 Mimics Properties of the Beta Subunit of Casein Kinase 2." *Proceedings of the National Academy of  
498 Sciences of the United States of America* 92 (13): 6067–71.
- 499 Brennecke, Julius, Alexei A. Aravin, Alexander Stark, Monica Dus, Manolis Kellis, Ravi Sachidanandam, and  
500 Gregory J. Hannon. 2007. "Discrete Small RNA-Generating Loci as Master Regulators of Transposon  
501 Activity in *Drosophila*." *Cell* 128 (6): 1089–1103.
- 502 Brosseau, G. E. 1960. "Genetic Analysis of the Male Fertility Factors on the Y Chromosome of *Drosophila  
503 Melanogaster*." *Genetics* 45 (3): 257–74.
- 504 Brown, Emily J., and Doris Bachtrog. 2014. "The Chromatin Landscape of *Drosophila*: Comparisons between  
505 Species, Sexes, and Chromosomes." *Genome Research* 24 (7): 1125–37.
- 506 Brown, Emily J., Alison H. Nguyen, and Doris Bachtrog. 2020. "The *Drosophila* Y Chromosome Affects  
507 Heterochromatin Integrity Genome-Wide." *Molecular Biology and Evolution* 37 (10): 2808–24.
- 508 Brown, James B., Nathan Boley, Robert Eisman, Gemma E. May, Marcus H. Stoiber, Michael O. Duff, Ben W.  
509 Booth, et al. 2014. "Diversity and Dynamics of the *Drosophila* Transcriptome." *Nature* 512 (7515): 393–  
510 99.
- 511 Busseau, I., M. C. Chaboissier, A. Péliisson, and A. Bucheton. 1994. "I Factors in *Drosophila Melanogaster*:  
512 Transposition under Control." *Genetica* 93 (1–3): 101–16.
- 513 Camacho, Christiam, George Coulouris, Vahram Avagyan, Ning Ma, Jason Papadopoulos, Kevin Bealer, and  
514 Thomas L. Madden. 2009. "BLAST+: Architecture and Applications." *BMC Bioinformatics* 10  
515 (December): 421.
- 516 Chalvet, F., C. di Franco, A. Terrinoni, A. Pelisson, N. Junakovic, and A. Bucheton. 1998. "Potentially Active  
517 Copies of the Gypsy Retroelement Are Confined to the Y Chromosome of Some Strains of *Drosophila  
518 Melanogaster* Possibly as the Result of the Female-Specific Effect of the Flamenco Gene." *Journal of  
519 Molecular Evolution* 46 (4): 437–41.
- 520

- 521 Chang, Ching Ho, and Amanda M. Larracunte. 2019. "Heterochromatin-Enriched Assemblies Reveal the  
522 Sequence and Organization of the *Drosophila Melanogaster* Y Chromosome." *Genetics* 211 (1): 333–  
523 48.
- 524 Chen, Peiwei, Alexei A. Kotov, Baira K. Godneeva, Sergei S. Bazylev, Ludmila V. Olenina, and Alexei A.  
525 Aravin. 2020. "PiRNA-Mediated Gene Regulation and Adaptation to Sex-Specific Transposon  
526 Expression in *D. Melanogaster* Male Germline." *BioRxiv*. <https://doi.org/10.1101/2020.08.25.266585>.
- 527 Chen, Shifu, Yanqing Zhou, Yaru Chen, and Jia Gu. 2018. "Fastp: An Ultra-Fast All-in-One FASTQ  
528 Preprocessor." *Bioinformatics (Oxford, England)* 34 (17): i884–90.
- 529 Cosby, Rachel L., Ni-Chen Chang, and Cédric Feschotte. 2019. "Host-Transposon Interactions: Conflict,  
530 Cooperation, and Cooption." *Genes & Development* 33 (17–18): 1098–1116.
- 531 Courret, Cécile, Ching-Ho Chang, Kevin H-C Wei, Catherine Montchamp-Moreau, and Amanda M.  
532 Larracunte. 2019. "Meiotic Drive Mechanisms: Lessons from *Drosophila*." *Proceedings. Biological  
533 Sciences* 286 (1913): 20191430.
- 534 Crysanto, Danang, and Darren J. Obbard. 2019. "Widespread Gene Duplication and Adaptive Evolution in the  
535 RNA Interference Pathways of the *Drosophila Obscura* Group." *BMC Evolutionary Biology* 19 (1): 99.
- 536 Czech, Benjamin, Marzia Munafò, Filippo Ciabrelli, Evelyn L. Eastwood, Martin H. Fabry, Emma Kneuss, and  
537 Gregory J. Hannon. 2018. "PiRNA-Guided Genome Defense: From Biogenesis to Silencing." *Annual  
538 Review of Genetics* 52: 131–57.
- 539 Danecek, Petr, James K. Bonfield, Jennifer Liddle, John Marshall, Valeriu Ohan, Martin O. Pollard, Andrew  
540 Whitwham, et al. 2021. "Twelve Years of SAMtools and BCFtools." *GigaScience* 10 (2).  
541 <https://doi.org/10.1093/gigascience/giab008>.
- 542 Dobin, Alexander, Carrie A. Davis, Felix Schlesinger, Jorg Drenkow, Chris Zaleski, Sonali Jha, Philippe Batut,  
543 Mark Chaisson, and Thomas R. Gingeras. 2013. "STAR: Ultrafast Universal RNA-Seq Aligner."  
544 *Bioinformatics (Oxford, England)* 29 (1): 15–21.
- 545 Dufourt, Jérémy, Cynthia Dennis, Antoine Boivin, Nathalie Gueguen, Emmanuelle Théron, Coline Goriaux,  
546 Pierre Pouchin, Stéphane Ronsseray, Emilie Brassset, and Chantal Vaury. 2014. "Spatio-Temporal  
547 Requirements for Transposable Element PiRNA-Mediated Silencing during *Drosophila* Oogenesis."  
548 *Nucleic Acids Research* 42 (4): 2512–24.
- 549 Fingerhut, Jaclyn M., Jessica V. Moran, and Yukiko M. Yamashita. 2019. "Satellite DNA-Containing Gigantic  
550 Introns in a Unique Gene Expression Program during *Drosophila* Spermatogenesis." *PLoS Genetics* 15  
551 (5): 1–23.
- 552 Francisco, Flávio O., and Bernardo Lemos. 2014. "How Do Y-Chromosomes Modulate Genome-Wide  
553 Epigenetic States: Genome Folding, Chromatin Sinks, and Gene Expression." *Journal of Genomics* 2  
554 (May): 94–103.
- 555 Gatti, Maurizio, and Sergio Pimpinelli. 1983. "Cytological and Genetic Analysis of the Y Chromosome of  
556 *Drosophila Melanogaster*." *Chromosoma* 88 (5): 349–73.
- 557 Goldstein, L. S., R. W. Hardy, and D. L. Lindsley. 1982. "Structural Genes on the Y Chromosome of *Drosophila  
558 Melanogaster*." *Proceedings of the National Academy of Sciences of the United States of America* 79  
559 (23): 7405–9.
- 560 Haoudi, A., M. Rachidi, M. H. Kim, S. Champion, M. Best-Belpomme, and C. Maisonhaute. 1997.  
561 "Developmental Expression Analysis of the 1731 Retrotransposon Reveals an Enhancement of Gag-  
562 Pol Frameshifting in Males of *Drosophila Melanogaster*." *Gene* 196 (1–2): 83–93.
- 563 Hardy, R. W., K. T. Tokuyasu, and D. L. Lindsley. 1981. "Analysis of Spermatogenesis in *Drosophila  
564 Melanogaster* Bearing Deletions for Y-Chromosome Fertility Genes." *Chromosoma* 83 (5): 593–617.
- 565 Hazelrigg, T., P. Fornili, and Thomas C. Kaufman. 1982. "A Cytogenetic Analysis of X-Ray Induced Male  
566 Steriles on the Y Chromosome of *Drosophila Melanogaster*." *Chromosoma* 87 (5): 535–59.
- 567 Helleu, Quentin, and Mia T. Levine. 2018. "Recurrent Amplification of the Heterochromatin Protein 1 (HP1)  
568 Gene Family across Diptera." *Molecular Biology and Evolution* 35 (10): 2375–89.
- 569 Henikoff, S. 1996. "Dosage-Dependent Modification of Position-Effect Variegation in *Drosophila*." *BioEssays:  
570 News and Reviews in Molecular, Cellular and Developmental Biology* 18 (5): 401–9.
- 571 Hennig, Wolfgang, and Alexandra Weyrich. 2013. "Histone Modifications in the Male Germ Line of *Drosophila  
572 a*." *BMC Developmental Biology* 13 (1): 1.

- 573 Hundertmark, Tim, Sabrina Kreutz, Nastasja Merle, Andrea Nist, Boris Lamp, Thorsten Stiewe, Alexander  
574 Brehm, Renate Renkawitz-Pohl, and Christina Rathke. 2019. "Drosophila Melanogaster TPlus3a and  
575 TPlus3b Ensure Full Male Fertility by Regulating Transcription of Y-Chromosomal, Seminal Fluid, and  
576 Heat Shock Genes." *PloS One* 14 (3): 1–22.
- 577 Hurst, L. D. 1996. "Further Evidence Consistent with Stellate's Involvement in Meiotic Drive." *Genetics* 142 (2):  
578 641–43.
- 579 Kennison, J. A. 1981. "The Genetic and Cytological Organization of the Y Chromosome of DROSOPHILA  
580 MELANOGASTER." *Genetics* 98 (3): 529–48.
- 581 Kim, Jongmin, Chenggang Lu, Shrividhya Srinivasan, Stephan Awe, Alexander Brehm, and Margaret T. Fuller.  
582 2017. "Cell Fate: Blocking Promiscuous Activation at Cryptic Promoters Directs Cell Type-Specific  
583 Gene Expression." *Science* 356 (6339): 717–21.
- 584 Kolaczkowski, Bryan, Daniel N. Hupalo, and Andrew D. Kern. 2011. "Recurrent Adaptation in RNA Interference  
585 Genes across the Drosophila Phylogeny." *Molecular Biology and Evolution* 28 (2): 1033–42.
- 586 Kotliar, Dylan, Adrian Veres, M. Aurel Nagy, Shervin Tabrizi, Eran Hodis, Douglas A. Melton, and Pardis C.  
587 Sabeti. 2019. "Identifying Gene Expression Programs of Cell-Type Identity and Cellular Activity with  
588 Single-Cell RNA-Seq." *ELife* 8: 1–26.
- 589 Kotov, Alexei A., Vladimir E. Adashev, Baira K. Godneeva, Maria Ninova, Aleksei S. Shatskikh, Sergei S.  
590 Bazylev, Alexei A. Aravin, and Ludmila V. Olenina. 2019. "PiRNA Silencing Contributes to Interspecies  
591 Hybrid Sterility and Reproductive Isolation in Drosophila Melanogaster." *Nucleic Acids Research* 47 (8):  
592 4255–71.
- 593 Lankenau, S., V. G. Corces, and D. H. Lankenau. 1994. "The Drosophila Microopia Retrotransposon Encodes a  
594 Testis-Specific Antisense RNA Complementary to Reverse Transcriptase." *Molecular and Cellular  
595 Biology* 14 (3): 1764–75.
- 596 Larkin, Aoife, Steven J. Marygold, Giulia Antonazzo, Helen Attrill, Gilberto Dos Santos, Phani V. Garapati,  
597 Joshua L. Goodman, et al. 2021. "FlyBase: Updates to the Drosophila Melanogaster Knowledge Base."  
598 *Nucleic Acids Research* 49 (D1): D899–907.
- 599 Lin, Ching-Jung, Fuqu Hu, Raphaelle Dubrulle, Jeffrey Vedanayagam, Jiayu Wen, Peter Smibert, Benjamin  
600 Loppin, and Eric C. Lai. 2018. "The HpRNA/RNAi Pathway Is Essential to Resolve Intragenomic  
601 Conflict in the Drosophila Male Germline." *Developmental Cell* 46 (3): 316–326.e5.
- 602 Lu, Dan, Ho Su Sin, Chenggang Lu, and Margaret T. Fuller. 2020. "Developmental Regulation of Cell Type-  
603 Specific Transcription by Novel Promoter-Proximal Sequence Elements." *Genes and Development* 34  
604 (9–10): 663–77.
- 605 Mahadevaraju, Sharvani, Justin Matthew Fear, Miriam Akeju, Brian J. Galletta, Mara M. L. S. Pinheiro, Camila  
606 C. Avelino, Diogo C. Cabral-de-Mello, et al. 2020. "Dynamic Sex Chromosome Expression in  
607 Drosophila Male Germ Cells." *BioRxiv*, 2020.03.23.000356.
- 608 Marshall, Owen J., Tony D. Southall, Seth W. Cheetham, and Andrea H. Brand. 2016. "Cell-Type-Specific  
609 Profiling of Protein–DNA Interactions without Cell Isolation Using Targeted DamID with next-Generation  
610 Sequencing." *Nature Protocols* 11 (9): 1586–98.
- 611 Martin, Marcel. 2011. "Cutadapt Removes Adapter Sequences from High-Throughput Sequencing Reads."  
612 *EMBnet.Journal* 17 (1): 10.
- 613 McKee, Bruce D., Rihui Yan, and Jui-He Tsai. 2012. "Meiosis in Male Drosophila." *Spermatogenesis* 2 (3):  
614 167–84.
- 615 Mölder, Felix, Kim Philipp Jablonski, Brice Letcher, Michael B. Hall, Christopher H. Tomkins-Tinch, Vanessa  
616 Sochat, Jan Forster, et al. 2021. "Sustainable Data Analysis with Snakemake." *F1000Research* 10  
617 (April): 33.
- 618 Morgan M, Pagès H, Obenchain V, Hayden N. 2020. "Rsamtools: Binary Alignment (BAM), FASTA, Variant  
619 Call (BCF), and Tabix File Import." *R Package Version 2.6.0*.  
620 <https://bioconductor.org/packages/Rsamtools>.
- 621 Nagao, Akihiro, Toutai Mituyama, Haidong Huang, Dahua Chen, Mikiko C. Siomi, and Haruhiko Siomi. 2010.  
622 "Biogenesis Pathways of PiRNAs Loaded onto AGO3 in the Drosophila Testis." *RNA* 16 (12): 2503–15.

- 623 Nishida, Kazumichi M., Kuniaki Saito, Tomoko Mori, Yoshinori Kawamura, Tomoko Nagami-Okada, Sachi  
624 Inagaki, Haruhiko Siomi, and Mikiko C. Siomi. 2007. "Gene Silencing Mechanisms Mediated by  
625 Aubergine–PiRNA Complexes in *Drosophila* Male Gonad." *RNA* 13 (11): 1911–22.
- 626 Obbard, Darren J., Francis M. Jiggins, Nicholas J. Bradshaw, and Tom J. Little. 2011. "Recent and Recurrent  
627 Selective Sweeps of the Antiviral RNAi Gene Argonaute-2 in Three Species of *Drosophila*." *Molecular  
628 Biology and Evolution* 28 (2): 1043–56.
- 629 Obbard, Darren J., Francis M. Jiggins, Daniel L. Halligan, and Tom J. Little. 2006. "Natural Selection Drives  
630 Extremely Rapid Evolution in Antiviral RNAi Genes." *Current Biology: CB* 16 (6): 580–85.
- 631 Parhad, Swapnil S., and William E. Theurkauf. 2019. "Rapid Evolution and Conserved Function of the PiRNA  
632 Pathway." *Open Biology* 9 (1): 180181.
- 633 Pasyukova, E., S. Nuzhdin, W. Li, and A. J. Flavell. 1997. "Germ Line Transposition of the Copia  
634 Retrotransposon in *Drosophila Melanogaster* Is Restricted to Males by Tissue-Specific Control of Copia  
635 RNA Levels." *Molecular & General Genetics: MGG* 255 (1): 115–24.
- 636 Pedersen, Brent S., and Aaron R. Quinlan. 2018. "Mosdepth: Quick Coverage Calculation for Genomes and  
637 Exomes." *Bioinformatics* 34 (5): 867–68.
- 638 Pedregosa, Fabian, Gaël Varoquaux, Alexandre Gramfort, Vincent Michel, Bertrand Thirion, Olivier Grisel,  
639 Mathieu Blondel, et al. 2012. "Scikit-Learn: Machine Learning in Python." *ArXiv [Cs.LG]*. arXiv.  
640 <http://arxiv.org/abs/1201.0490>.
- 641 Péllisson, A., S. U. Song, N. Prud'homme, P. A. Smith, A. Bucheton, and V. G. Corces. 1994. "Gypsy  
642 Transposition Correlates with the Production of a Retroviral Envelope-like Protein under the Tissue-  
643 Specific Control of the *Drosophila* Flamenco Gene." *The EMBO Journal* 13 (18): 4401–11.
- 644 "Picard." n.d. Accessed April 15, 2021. <http://broadinstitute.github.io/picard/>.
- 645 Pliner, Hannah A., Jay Shendure, and Cole Trapnell. 2019. "Supervised Classification Enables Rapid  
646 Annotation of Cell Atlases." *Nature Methods* 16 (10): 983–86.
- 647 Quénerch'du, Emilie, Amit Anand, and Kai Toshie. 2016. "The PiRNA Pathway Is Developmentally Regulated  
648 during Spermatogenesis in *Drosophila*." *RNA* 22 (7): 1044–54.
- 649 Rahman, Reazur, Gung Wei Chirn, Abhay Kanodia, Yuliya A. Sytnikova, Björn Brembs, Casey M. Bergman,  
650 and Nelson C. Lau. 2015. "Unique Transposon Landscapes Are Pervasive across *Drosophila  
651 Melanogaster* Genomes." *Nucleic Acids Research* 43 (22): 10655–72.
- 652 Ramírez, Fidel, Friederike Dündar, Sarah Diehl, Björn A. Grüning, and Thomas Manke. 2014. "DeepTools: A  
653 Flexible Platform for Exploring Deep-Sequencing Data." *Nucleic Acids Research* 42 (Web Server  
654 issue): W187-91.
- 655 Redhouse, Juliet L., Julien Mozziconacci, and Robert A. H. White. 2011. "Co-Transcriptional Architecture in a  
656 Y Loop in *Drosophila Melanogaster*." *Chromosoma* 120 (4): 399–407.
- 657 Roche, S. E., M. Schiff, and D. C. Rio. 1995. "P-Element Repressor Autoregulation Involves Germ-Line  
658 Transcriptional Repression and Reduction of Third Intron Splicing." *Genes & Development* 9 (10):  
659 1278–88.
- 660 Saelens, Wouter, Robrecht Cannoodt, and Yvan Saeys. 2018. "A Comprehensive Evaluation of Module  
661 Detection Methods for Gene Expression Data." *Nature Communications* 9 (1).  
662 <https://doi.org/10.1038/s41467-018-03424-4>.
- 663 Schindelin, Johannes, Ignacio Arganda-Carreras, Erwin Frise, Verena Kaynig, Mark Longair, Tobias Pietzsch,  
664 Stephan Preibisch, et al. 2012. "Fiji: An Open-Source Platform for Biological-Image Analysis." *Nature  
665 Methods* 9 (7): 676–82.
- 666 Simkin, Alfred, Alex Wong, Yu-Ping Poh, William E. Theurkauf, and Jeffrey D. Jensen. 2013. "Recurrent and  
667 Recent Selective Sweeps in the PiRNA Pathway." *Evolution; International Journal of Organic Evolution*  
668 67 (4): 1081–90.
- 669 Smith, A., R. Hubley, and P. Green. 2013. "RepeatMasker Open-4.0." *RepeatMasker Open-4.0*.
- 670 Strimmer, Korbinian. 2008. "Fdrtool: A Versatile R Package for Estimating Local and Tail Area-Based False  
671 Discovery Rates." *Bioinformatics (Oxford, England)* 24 (12): 1461–62.
- 672 Traag, V. A., L. Waltman, and N. J. van Eck. 2019. "From Louvain to Leiden: Guaranteeing Well-Connected  
673 Communities." *Scientific Reports* 9 (1): 5233.

- 674 Vasimuddin, Md, Sanchit Misra, Heng Li, and Srinivas Aluru. 2019. "Efficient Architecture-Aware Acceleration  
675 of BWA-MEM for Multicore Systems." In *2019 IEEE International Parallel and Distributed Processing  
676 Symposium (IPDPS)*. IEEE. <https://doi.org/10.1109/ipdps.2019.00041>.
- 677 Wang, Lu, Kun Dou, Sungjin Moon, Frederick J. Tan, and Z. Z. Zhao Zhang. 2018. "Hijacking Oogenesis  
678 Enables Massive Propagation of LINE and Retroviral Transposons." *Cell* 174 (5): 1082-1094.e12.
- 679 Wei, Kevin H-C, Lauren Gibilisco, and Doris Bachtrog. 2020. "Epigenetic Conflict on a Degenerating Y  
680 Chromosome Increases Mutational Burden in Drosophila Males." *Nature Communications* 11 (1): 5537.
- 681 White-Cooper, H., M. A. Schäfer, L. S. Alphey, and M. T. Fuller. 1998. "Transcriptional and Post-  
682 Transcriptional Control Mechanisms Coordinate the Onset of Spermatid Differentiation with Meiosis I in  
683 Drosophila." *Development* 125 (1): 125–34.
- 684 Witt, Evan, Sigi Benjamin, Nicolas Svetec, and Li Zhao. 2019. "Testis Single-Cell RNA-Seq Reveals the  
685 Dynamics of de Novo Gene Transcription and Germline Mutational Bias in Drosophila." *ELife* 8  
686 (August). <https://doi.org/10.7554/eLife.47138>.
- 687 Wolf, F. Alexander, Philipp Angerer, and Fabian J. Theis. 2018. "SCANPY: Large-Scale Single-Cell Gene  
688 Expression Data Analysis." *Genome Biology* 19 (1): 15.
- 689 Wolock, Samuel L., Romain Lopez, and Allon M. Klein. 2019. "Scrublet: Computational Identification of Cell  
690 Doublets in Single-Cell Transcriptomic Data." *Cell Systems* 8 (4): 281-291.e9.
- 691 Zheng, Grace X. Y., Jessica M. Terry, Phillip Belgrader, Paul Ryvkin, Zachary W. Bent, Ryan Wilson, Solongo  
692 B. Ziraldo, et al. 2017. "Massively Parallel Digital Transcriptional Profiling of Single Cells." *Nature  
693 Communications* 8. <https://doi.org/10.1038/ncomms14049>.



## Supplementary Table 1

|         |                                                     |                                                                             |                                                    |
|---------|-----------------------------------------------------|-----------------------------------------------------------------------------|----------------------------------------------------|
| aly     | Spermatocyte                                        | White-Cooper et al. 1998; Mahadevaraju et al. 2021                          |                                                    |
| sa      |                                                     | White-Cooper et al. 1998; Mahadevaraju et al. 2021                          |                                                    |
| tbrd-1  |                                                     | Theofel et al. 2014; Leser et al. 2012; Mahadevaraju et al. 2021            |                                                    |
| tbrd-2  |                                                     | Theofel et al. 2014; Mahadevaraju et al. 2021                               |                                                    |
| bol     |                                                     | Maines and Wasserman 1999; Mahadevaraju et al. 2021                         |                                                    |
| fzo     |                                                     | Hwa et al. 2002; Mahadevaraju et al. 2021                                   |                                                    |
| Ance    |                                                     | Hurst et al. 2003; Mahadevaraju et al. 2021                                 |                                                    |
| dj      |                                                     | Santel et al. 1997; Lim, Tahrayrah, and Chen 2012; Mahadevaraju et al. 2021 |                                                    |
| ocn     |                                                     | Mikhaylova and Nurminsky 2011; Mahadevaraju et al. 2021                     |                                                    |
| CycB    |                                                     | Perezgasga et al. 2004; Mahadevaraju et al. 2021                            |                                                    |
| twin    |                                                     | Mahadevaraju et al. 2021                                                    |                                                    |
| bb8     |                                                     | Vedelek et al. 2016; Mahadevaraju et al. 2021                               |                                                    |
| AGO3    |                                                     | Spermatogonia                                                               | Quenerch' du et al. 2016; Mahadevaraju et al. 2021 |
| vas     |                                                     |                                                                             | Lasko and Ashburner 1990; Mahadevaraju et al. 2021 |
| bam     | Eun et al. 2013; Mahadevaraju et al. 2021           |                                                                             |                                                    |
| aub     | Quenerch' du et al. 2016; Mahadevaraju et al. 2021  |                                                                             |                                                    |
| p53     | Monk, Abud, and Hime 2012; Mahadevaraju et al. 2021 |                                                                             |                                                    |
| Dek     | Mahadevaraju et al. 2021                            |                                                                             |                                                    |
| osa     | Mahadevaraju et al. 2021                            |                                                                             |                                                    |
| CycA    | Mahadevaraju et al. 2021                            |                                                                             |                                                    |
| tj      | Cyst                                                | Li et al. 2003; Mahadevaraju et al. 2021                                    |                                                    |
| eya     |                                                     | Zoller and Schulz 2012; Mahadevaraju et al. 2021                            |                                                    |
| piwi    |                                                     | Nishida et al. 2007; Mahadevaraju et al. 2021                               |                                                    |
| bnb     |                                                     | Terry et al. 2006; Mahadevaraju et al. 2021                                 |                                                    |
| Nrt     |                                                     | Terry et al. 2006; Mahadevaraju et al. 2021                                 |                                                    |
| Wnt4    |                                                     | Terry et al. 2006; Mahadevaraju et al. 2021                                 |                                                    |
| Fas3    | Terminal Epithelial                                 | Mahadevaraju et al. 2021; Mahadevaraju et al. 2021                          |                                                    |
| nord    |                                                     | Mahadevaraju et al. 2021; Mahadevaraju et al. 2021                          |                                                    |
| Piezo   |                                                     | Mahadevaraju et al. 2021; Mahadevaraju et al. 2021                          |                                                    |
| Sox100B | Pigment                                             | Nanda et al. 2009; Mahadevaraju et al. 2021                                 |                                                    |
| ems     |                                                     | Nanda et al. 2009; Mahadevaraju et al. 2021                                 |                                                    |

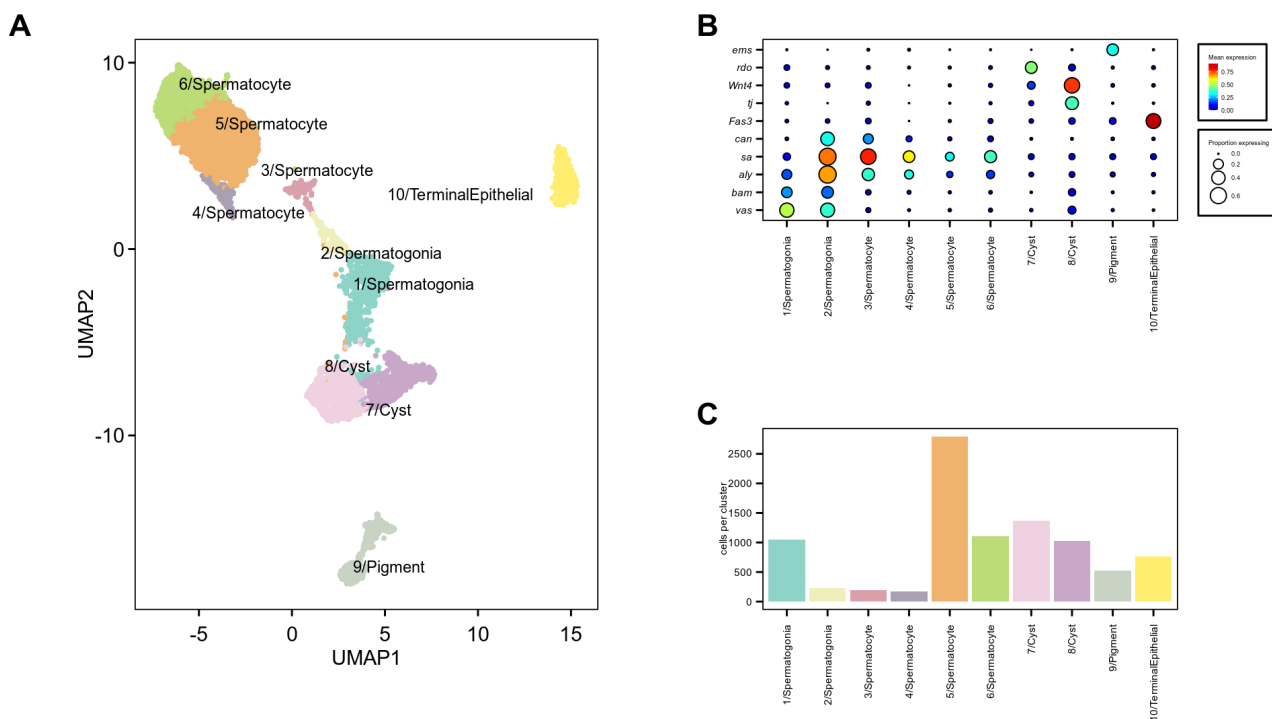

**Figure 1: Identification of testis cell populations.** **A)** UMAP projection groups transcriptionally similar cells in 2D space. Cells are colored by assigned cell type. **B)** Dot plot shows expression of selected marker genes used for cell type assignment. Color of each dot corresponds to mean normalized and log-transformed expression within cell clusters. Dot size corresponds to the proportion of cells in each cluster expressing the marker. **C)** Cell counts within each cell type cluster.

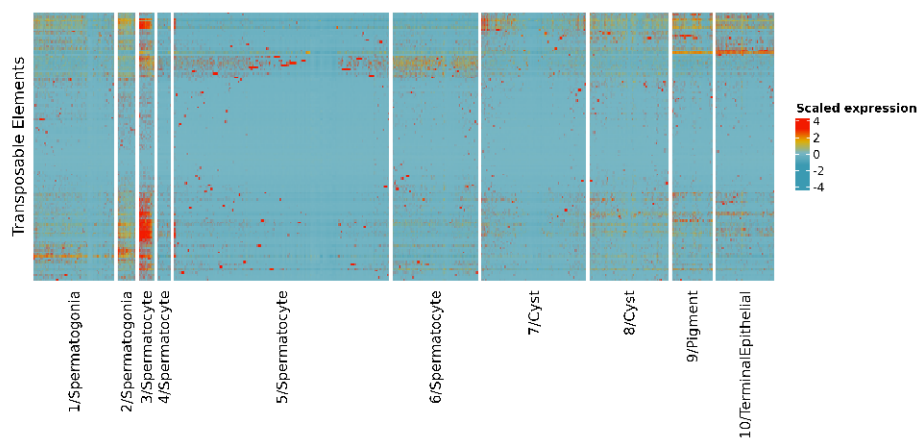

*Figure 2: A spermatocyte cluster expresses transposons at high levels.* Heatmap shows scaled expression level of all transposable elements detected in this dataset across all cells. Several clusters express small groups of transposable elements uniformly or show sporadic expression of transposons in some member cells. Cluster 3/Spermatocyte shows uniformly high expression of many transposable elements.

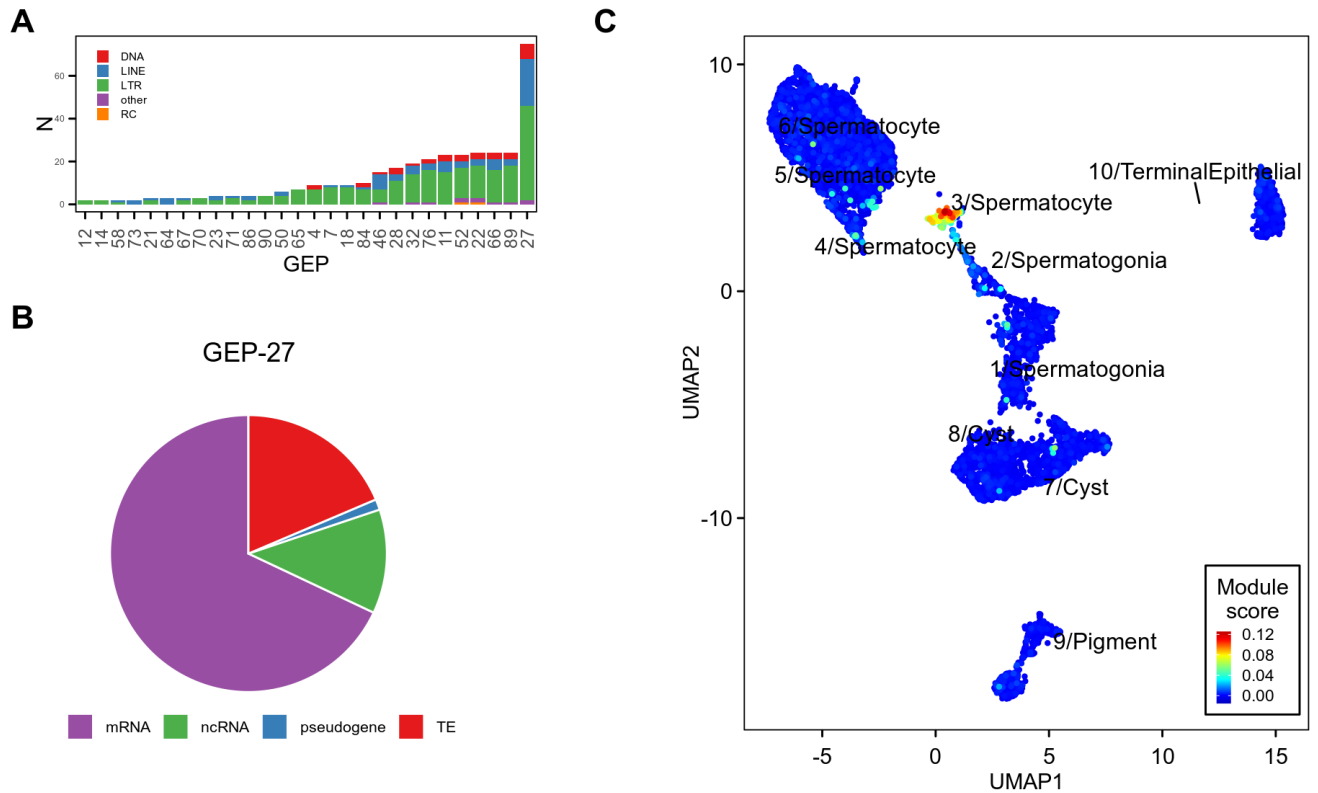

**Figure 3: A TE-enriched gene expression program is expressed primarily in cluster 3/Spermatocytes. A)** Tallies of TE classes found in each GEP containing at least 1 TE. GEP-27 contains almost four-fold more TEs than the next most TE-rich GEP and is predominately composed of LTR retrotransposons (59%), LINE (29%) and DNA (9%) elements. **B)** GEP-27 contains over 300 total features, the vast majority of which are either protein-coding genes (68%), TEs (18.6%), or non-coding RNAs (12%). **C)** UMAP projection colored by GEP-27 expression score. Expression score is derived from the consensus (averaged) ICA source matrix.

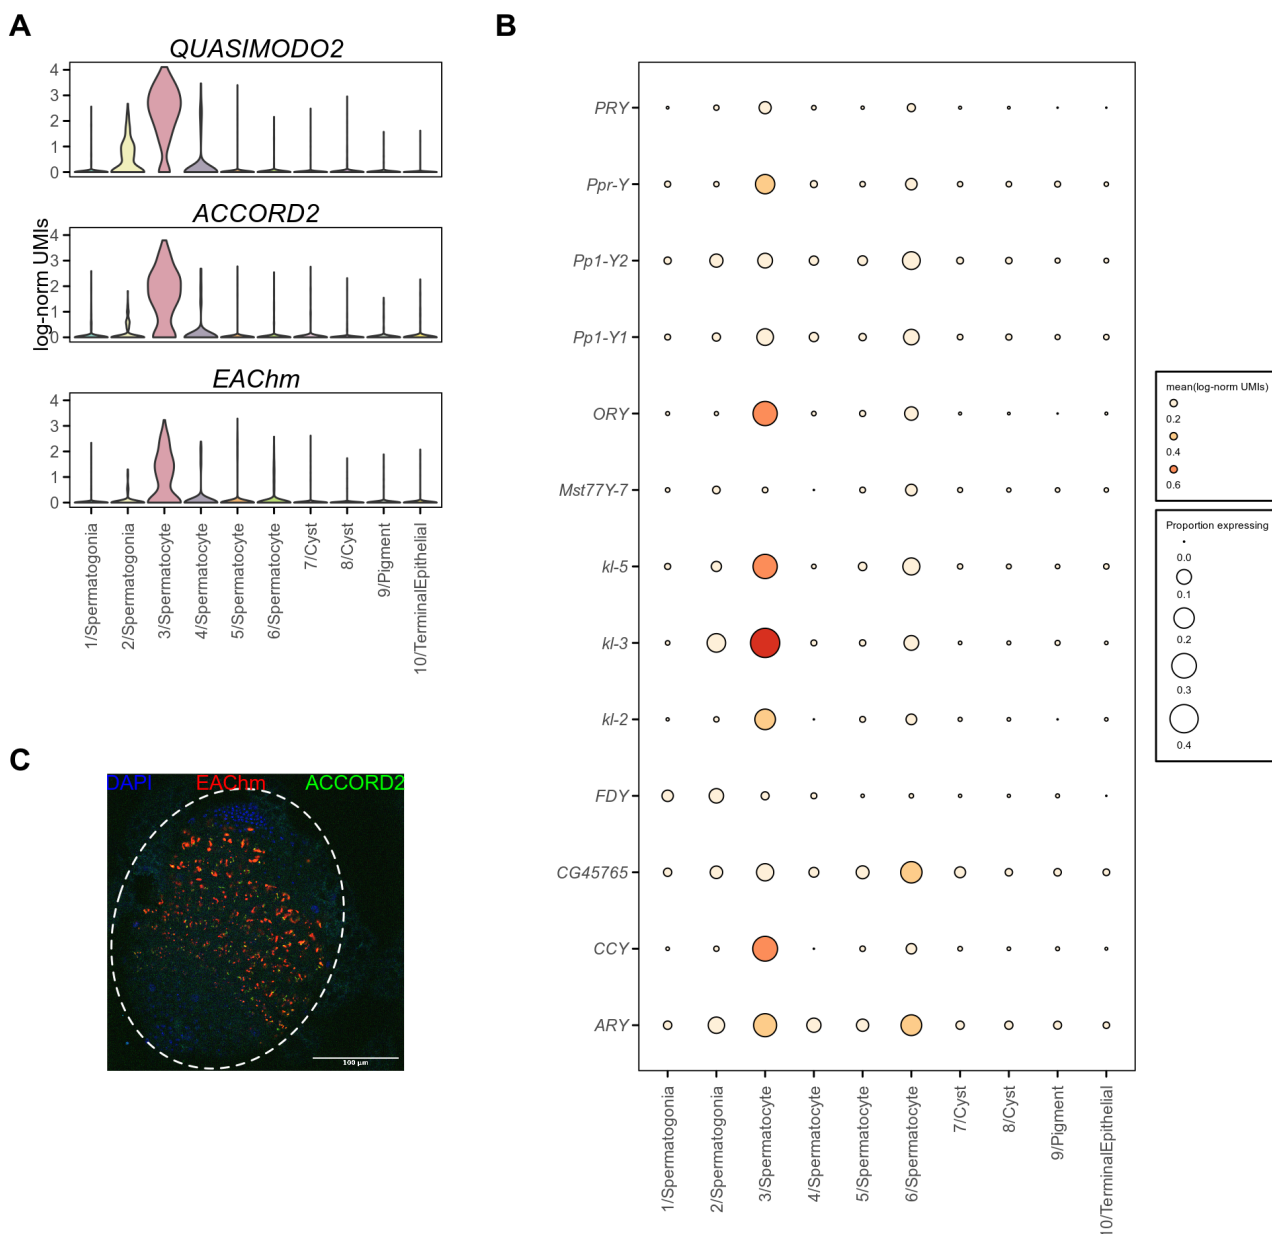

**Figure 4. TEP co-occurs with Y chromosome transcriptional activity.** **A)** Violin plot shows normalized expression of *EACHm*, *QUASIMODO2*, and *ACCORD2* is largely confined to cluster 3/Spermatocyte. **B)** Multiplexed RNA-FISH in whole-mount 3rd larval instar w1118 testis shows *ACCORD2* and *EACHm* expression is detected in the middle region of the testis, where primary spermatocytes are located. Red: *EACHm*; green: *ACCORD2*; blue: DAPI. **C)** Dot plot shows mean normalized expression of Y-linked genes in each cluster. Dot size corresponds to the proportion of cells in each cluster with detectable expression of each Y-linked gene. Y-linked genes, especially fertility factors *kl-3* and *kl-5*, are highly expressed by cluster 3/Spermatocyte.

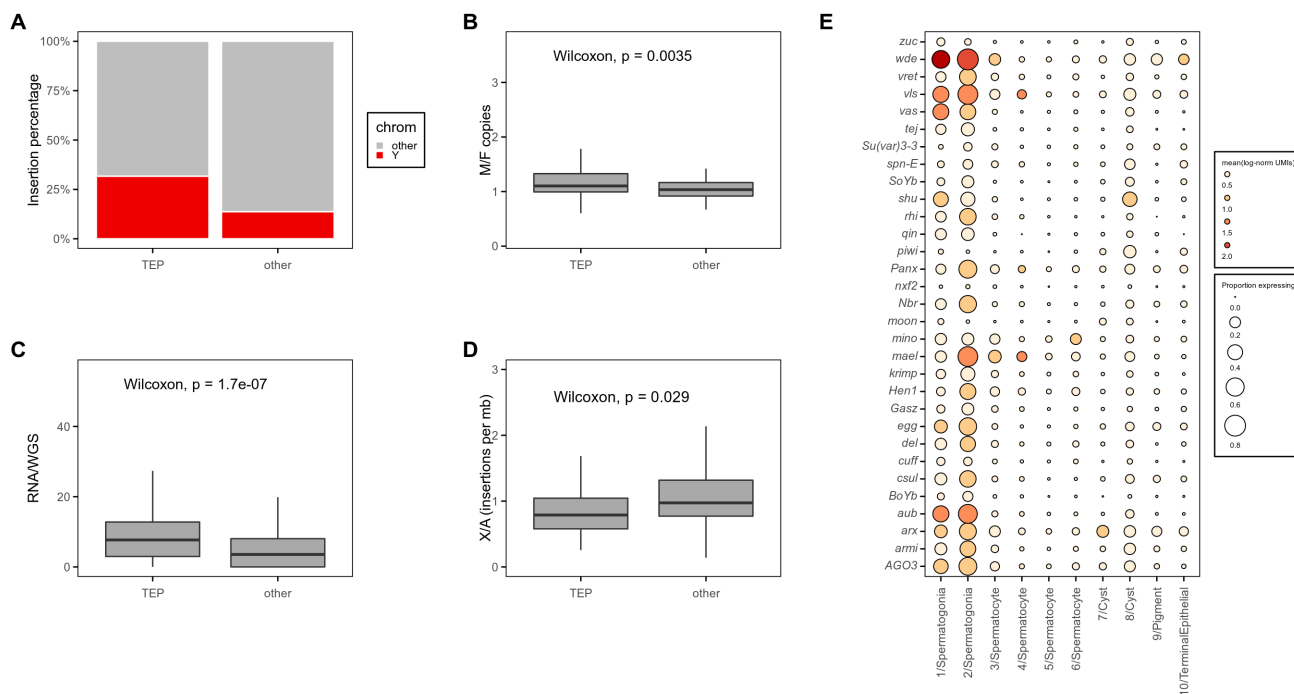

**Figure 5. TEP-TEs are enriched on the Y chromosome. A)** A higher proportion of TEP-TE insertions are found on the Y chromosome compared to non-TEP-TEs. Chi-square test,  $P = 2.29\text{e-}292$ . To better estimate Y-linked insertions despite the incomplete Y-assembly in the reference sequence, insertions were mapped from a heterochromatin-enriched assembly (see **Methods**). **B)** Ratios of male and female copy number for individual TEs estimated from w1118 WGS coverage. TEP-TEs are present at higher copy number in the male genome Wilcoxon rank-sum test,  $P=0.0035$ . **C)** Allele specific analysis of TE expression (see **Methods**) shows that Y-linked copies of TEP TEs are overexpressed relative to their DNA copy number and this overexpression is significantly larger than that of non-TEP-TEs Wilcoxon rank-sum test,  $P=1.7\text{e-}07$ . **D)** Boxplot showing the ratios of X-linked versus autosomal polymorphic insertions for each TE in the TIDAL-fly (ref) database. TEP-TEs are depleted from the X compared to other TEs with polymorphic insertions. Wilcoxon rank-sum test,  $P = 0.029$ . **E)** Dot plot shows expression of selected piRNA pathway genes. Color of each dot corresponds to mean normalized and log-transformed expression within cell clusters. Dot size corresponds to the proportion of cells in each cluster expressing the marker.

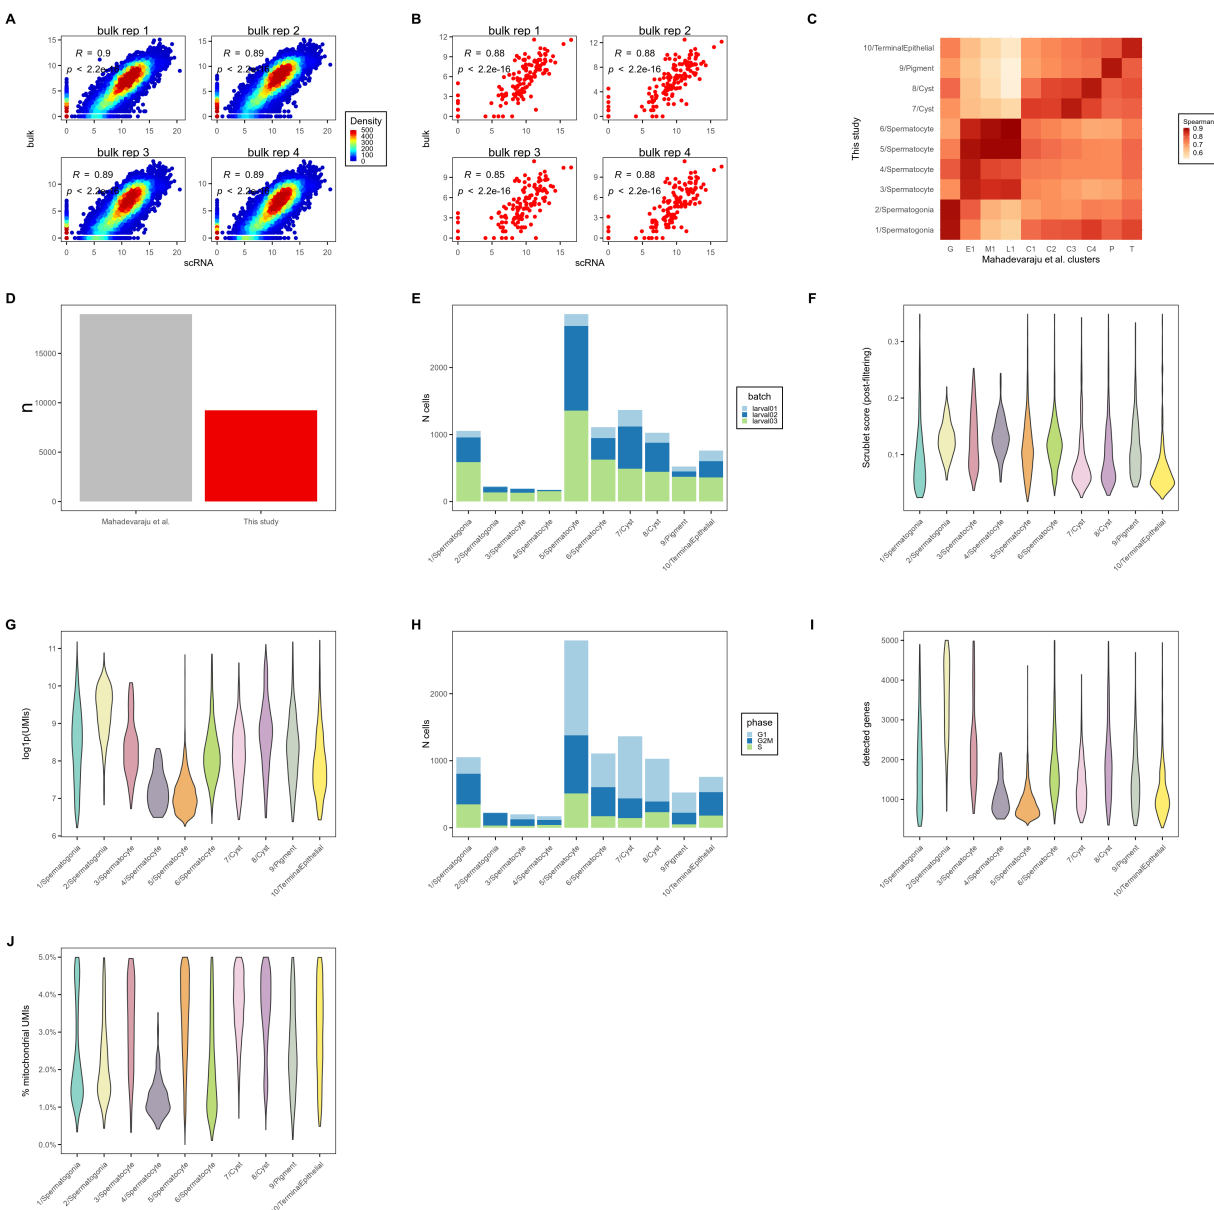

**Supplementary Figure 1. scRNA-seq data.** **A)** Scatterplots show pseudo-bulk expression derived from our *w1118* scRNA pipeline (see **Methods**) versus bulk expression for 4 *w1118* testis poly-A RNA-seq replicates generated by Mahadevaraju et al. 2021 (see **Methods**). Each replicate shows strong correlation with pseudo-bulk (all Pearson's  $R \geq 0.89$ ,  $P < 2.2e-16$ ). **B)** Scatterplots show same analysis described in **A** but restricted to TEs (all Pearson's  $R \geq 0.85$ ,  $P < 2.2e-16$ ). **C)** Heatmap shows correlation between scRNA-seq expression estimates derived from our pipeline for all clusters identified in this study compared to clusters identified by Mahadevaraju et al. 2021 (source of data). **D)** Barplot shows the number of cells used in Mahadevaraju et al. 2021 (gray) and this study (red). **E)** Barplot shows the number of cells assigned to each cluster. Bars are divided and colored by the scRNA replicate from which cells are derived. **F)** Distribution of doublet scores (see **Methods**) for cells in each cluster after all filtering steps. **G)** Distribution of total  $\log_1 p(\text{UMIs})$  for cells in each cluster after all filtering steps. **H)** Barplot shows the number of cells assigned to each cluster. Bars are divided and colored by predicted cell cycle phase (see **Methods**). **I)** Distribution of total detected genes for cells in each cluster after all filtering steps. **J)** Distribution of the percentage of total pre-filtering mitochondrial reads for cells in each cluster after all filtering steps.

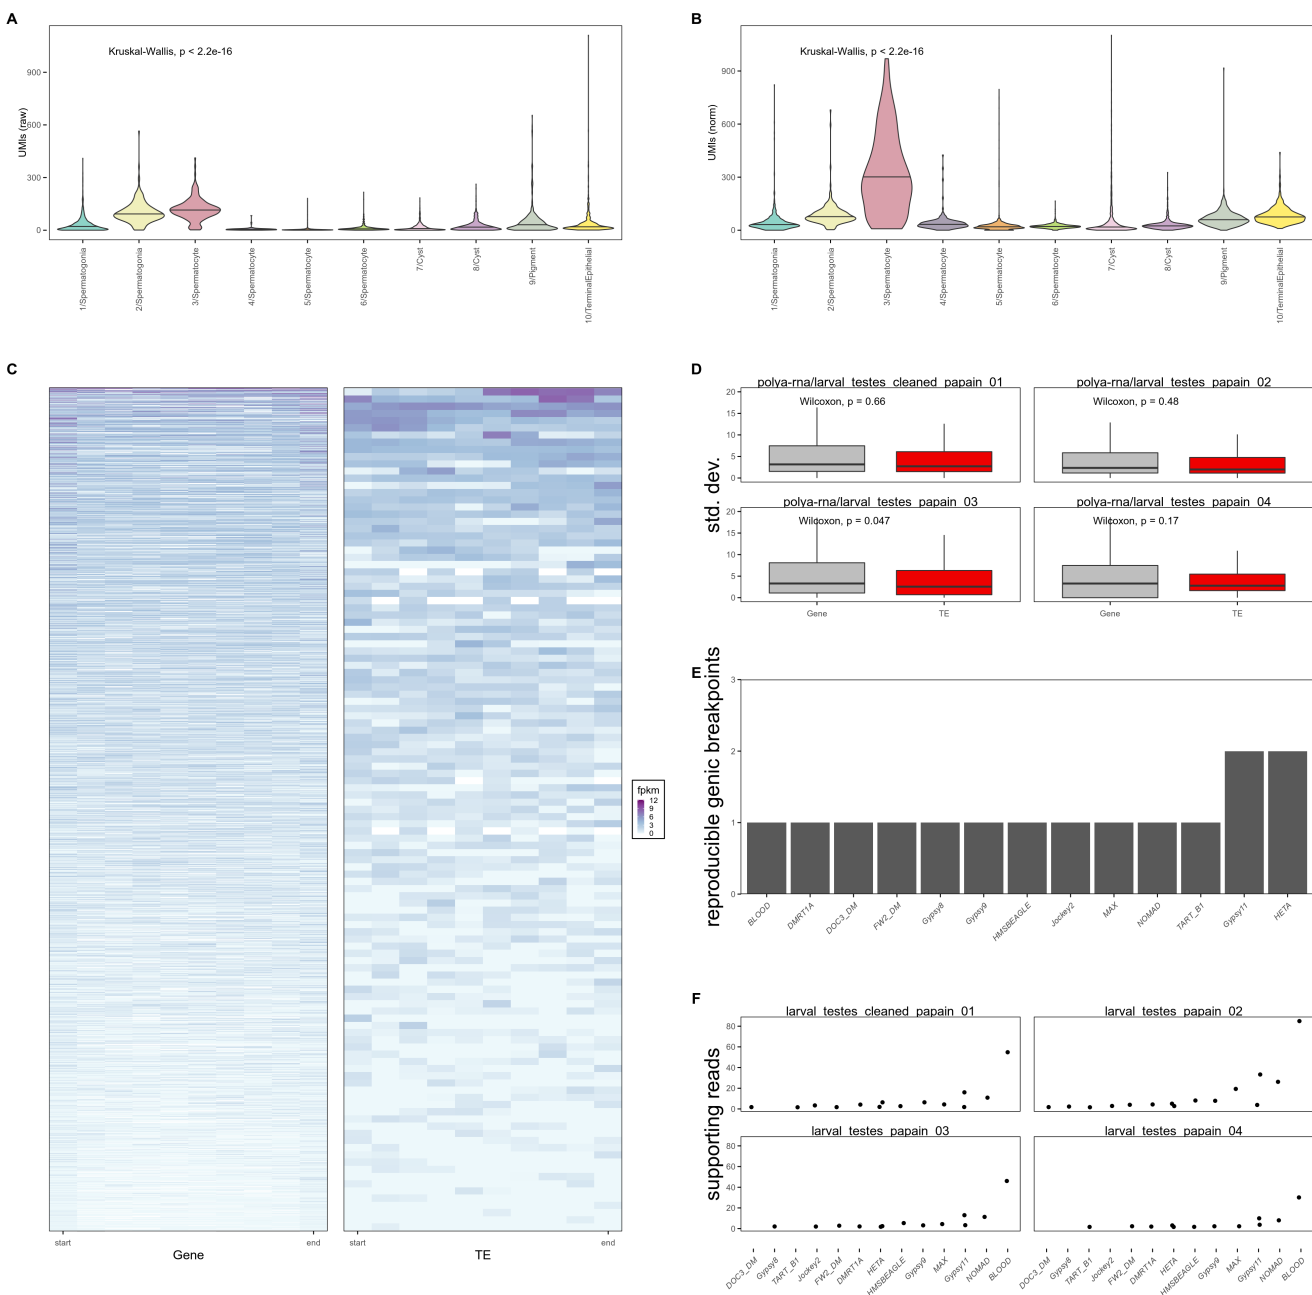

**Supplementary Figure 2. TE expression in scRNA.** **A)** Violin plots show distributions of raw TE-mapping UMI counts in each L3 *w1118* cell cluster. TE counts vary significantly among the clusters (Kruskal-Wallis,  $p < 2.2e-16$ ). **B)** Violin plots show distributions of depth normalized TE-mapping UMI counts in each L3 *w1118* cell cluster. TE counts vary significantly among the clusters (Kruskal-Wallis,  $p < 2.2e-16$ ). **C)** Heatmaps show distribution of sense-strand poly-A RNA-seq signal for single-isoform host gene mRNAs (left) and detected TEs (right) in bins comprising the full length of the respective features. poly-A RNA-seq data generated by Mahadevaraju et al 2021 (see **Methods**). **D)** Boxplots show standard deviations of expression across bins for host genes (gray) and TEs (red). Three of four replicates show no significant difference in variability of poly-A signal across bins within features (Wilcoxon rank-sum test  $P > 0.05$ ). Replicate 3 shows a significant difference (Wilcoxon rank-sum test,  $P = 0.047$ ). **E)** Bar plot shows number of genic fusions reproducibly found in poly-A RNA-seq data. **F)** For each TE introduced in **E**, the y-axis position of each point represents the number of uniquely-mapping chimeric reads detected by STAR that support each breakpoint (see **Methods**).



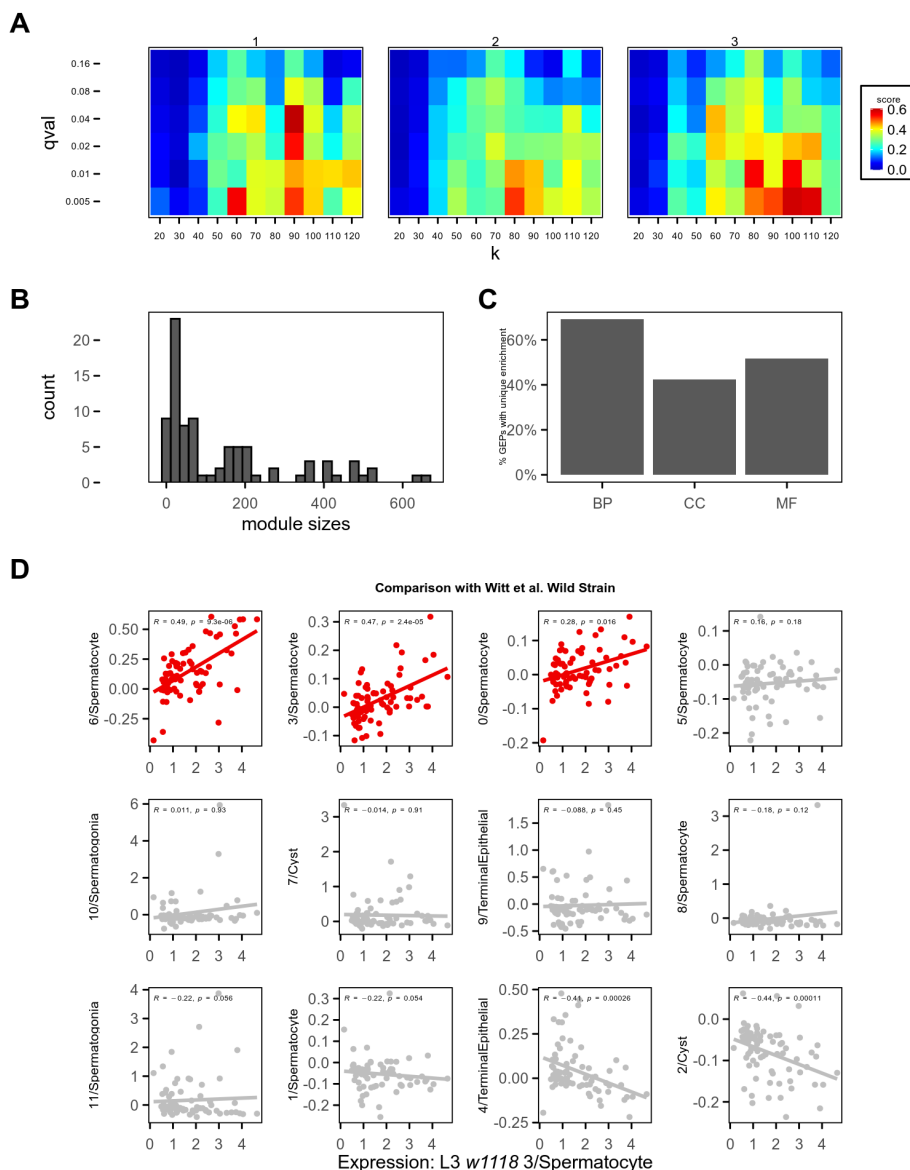

**Supplementary Figure 3. Gene Expression Program detection via consensus approach to Independent Component Analysis.** **A)** Heatmaps correspond to independent replicates of the grid search approach used to optimize ICA component number ( $k$ ) and  $q$ -value cutoff. Color intensity corresponds to the enrichment score (see **Methods**) for each combination of  $q$  and  $k$ . **B)** Histogram shows module sizes among the set of GEPs used in main analysis. The majority of modules detected include fewer than 100 features. **C)** Barplots show percentage of discovered GEPs with at least 1 unique Biological Process, Cellular Component, or Molecular Function enrichment. **D)** Scatterplots show relationship of TE expression in *w1118* Cluster 3/Spermatocyte versus all clusters detected by our pipeline in the “Wild Strain” dataset generated by Witt et al. 2019. Multiple spermatocyte clusters (highlighted in red) show TE expression patterns similar to 3/Spermatocyte.

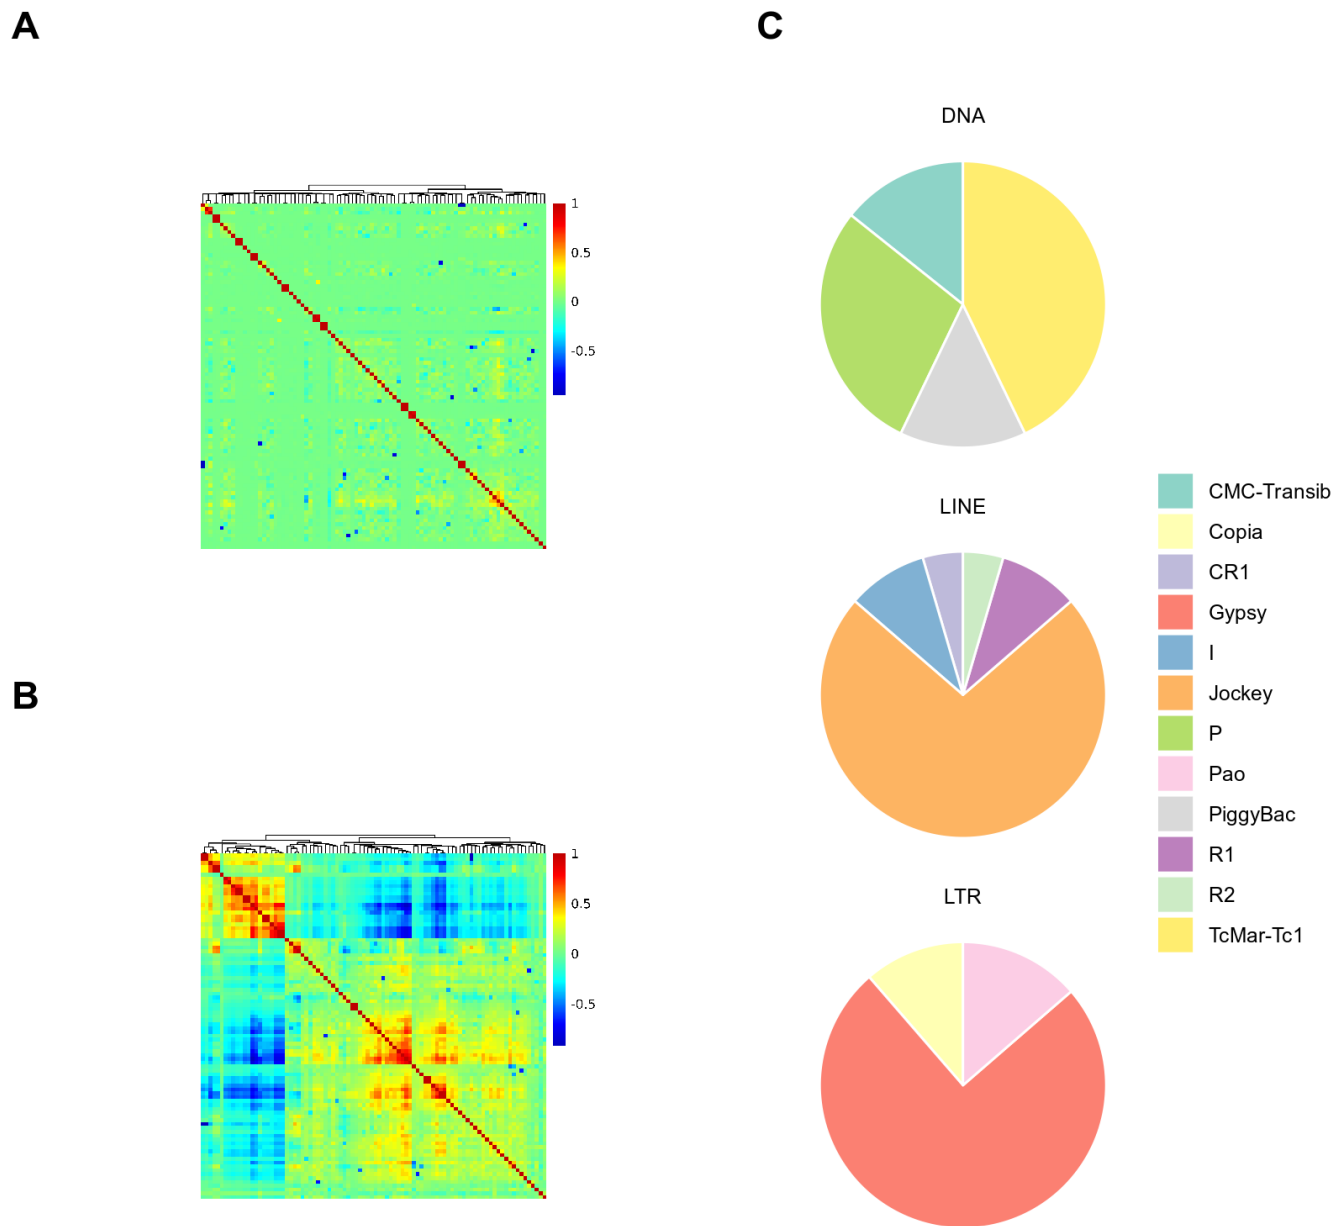

*Supplementary Figure 4. Redundancy and TE content of GEPs. A) Clustering of GEPs by cell usage score (consensus ICA source matrix). B) Clustering of GEPs by gene membership score (consensus ICA mixing matrix). For A,B 1-Pearson's R is used as a distance metric. C) Breakdown of specific DNA TE, LINE, and LTR TE families in GEP-27.*

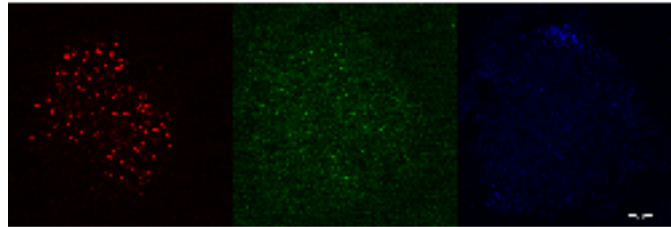

*Supplementary Figure 5. ACCORD2 and EACHm expression in L3 testes.* Representative slice of multiplexed RNA-FISH in whole-mount 3rd larval instar w1118 testis. Image is split by color channel. *ACCORD2* and *EACHm* expression is detected in the middle region of the testis, where primary spermatocytes are located. Red: *EACHm*; green: *ACCORD2*; blue: DAPI.

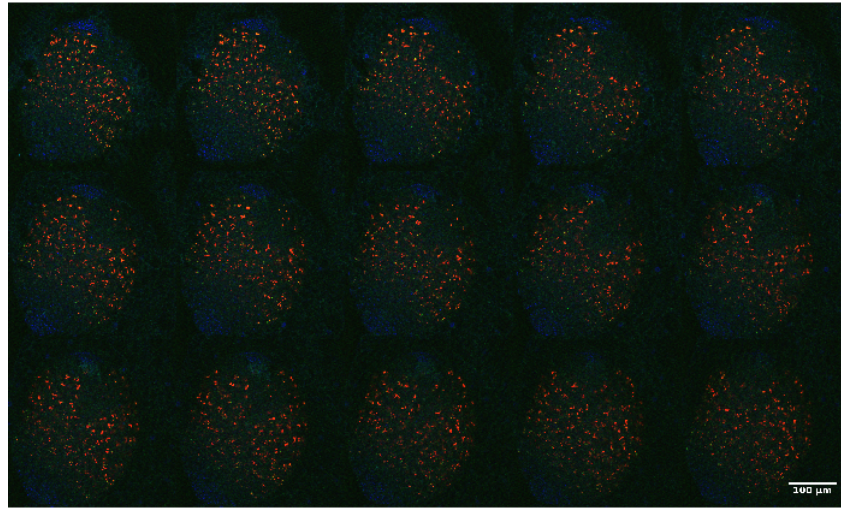

*Supplementary Figure 6. ACCORD2 and EACHm expression in L3 testes. Z-slices montage of multiplexed RNA-FISH in whole-mount 3rd larval instar w1118 testis. ACCORD2 and EACHm expression is detected in the middle region of the testis, where primary spermatocytes are located. Red: EACHm; green: ACCORD2; blue: DAPI.*

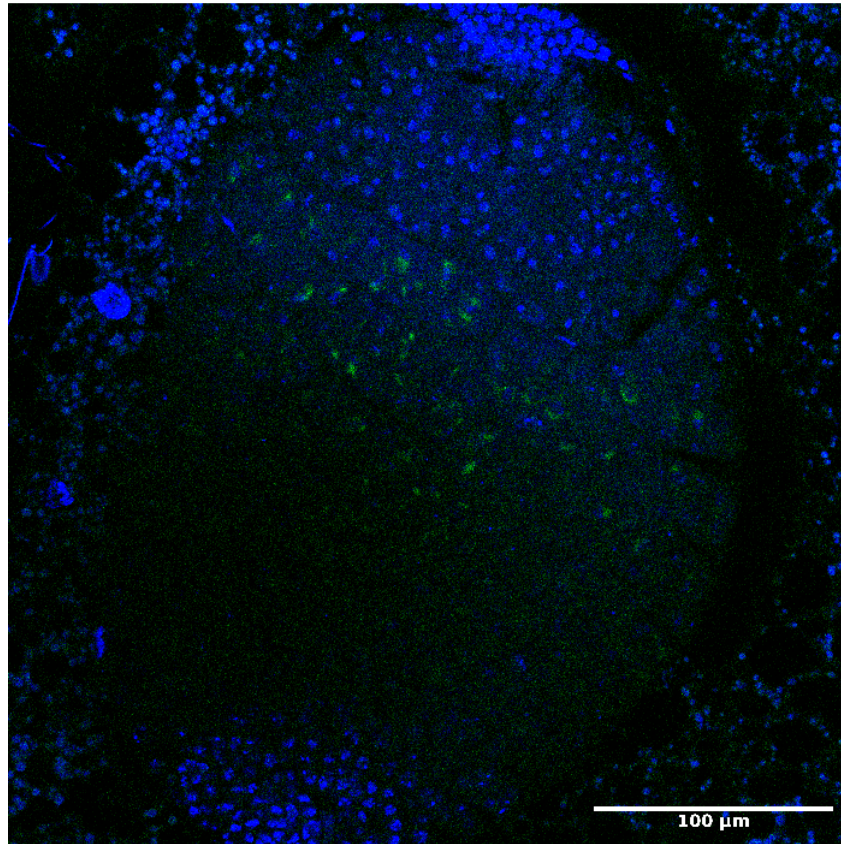

*Supplementary Figure 7. QUASIMODO2 expression in L3 testes.* Representative RNA-FISH z-slice in whole-mount 3rd larval instar *w1118* testis. *QUASIMODO2* expression is detected in the middle region of the testis, where primary spermatocytes are located. Green: *QUASIMODO2*; blue: DAPI.

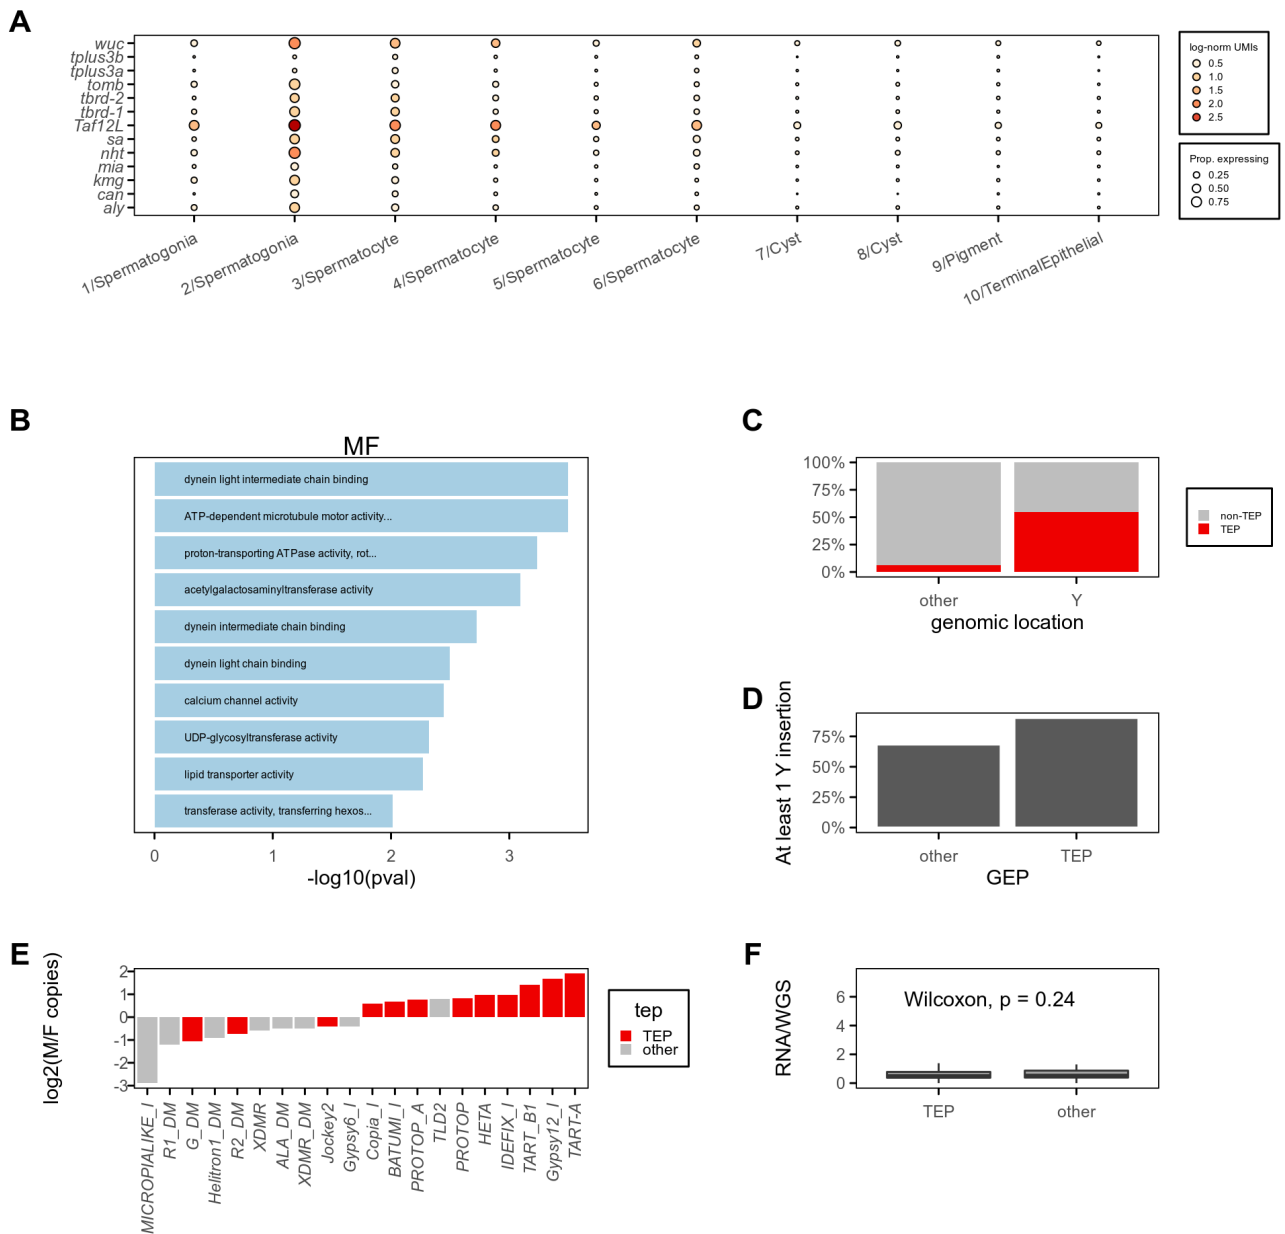

**Supplementary Figure 8. TEP-TEs are enriched on the Y-chromosome. A)** Dot plot shows expression of selected effectors of spermatocyte transcriptional programs. Color of each dot corresponds to mean normalized and log-transformed expression within cell clusters. Dot size corresponds to the proportion of cells in each cluster expressing the marker. **B)** Bars show strength of top 10 enriched Gene Ontology Molecular Function terms for GEP-27. **C)** Bar plot shows proportion of Y chromosome genes or other genes that are assigned to the TE-enriched Program or other GEPs. Chi-square test  $P=1.7e-05$ . **D)** Barplot shows percentage of TEP or non-TEP TEs with at least 1 Y-linked insertion detected by RepeatMasker in the heterochromatin-enriched assembly described by Chang and Larracuente 2019. **E)** Bars represent the ratios of male to female estimated copies for the top 10 male- and female-enriched TEs. Bars are colored by membership in TEP. **F)** Allele specific analysis of TE expression (see **Methods**) shows that non-Y-linked copies of TEP TEs are expressed proportionately to their DNA copy number. Wilcoxon rank-sum test,  $P=0.24$ .
